1 **Title: Medial prefrontal cortex represents the object-based cognitive map when**  
2 **remembering an egocentric target location**

3 **Authors: Bo Zhang<sup>1</sup> and Yuji Naya<sup>1, 2, 3, 4, \*</sup>**

4 **Affiliations:**

5 <sup>1</sup> School of Psychological and Cognitive Sciences, Peking University, No. 52, Haidian Road,  
6 Haidian District, Beijing 100805, China

7 <sup>2</sup> Center for Life Sciences, Peking University, No. 52, Haidian Road, Haidian District,  
8 Beijing 100805, China

9 <sup>3</sup> IDG/McGovern Institute for Brain Research at Peking University, No. 52, Haidian Road,  
10 Haidian District, Beijing 100805, China

11 <sup>4</sup> Beijing Key Laboratory of Behavior and Mental Health, Peking University, No. 52, Haidian  
12 Road, Haidian District, Beijing 100805, China

13 **Corresponding author:** Yuji Naya

14 Address: School of Psychological and Cognitive Sciences, Peking University, No. 52,  
15 Haidian Road, Wang Kezhen Building, Room 1707, Haidian District, Beijing 100805, China

16 E-mail: yujin@pku.edu.cn

17 **Conflict of interest statement:** no competing financial interests

18

19 **Abstract**

20 A cognitive map, representing an environment around oneself, is necessary for spatial  
21 navigation. However, compared with its constituent elements such as individual landmarks,  
22 neural substrates of coherent spatial information remain largely unknown. The present study  
23 investigated how the brain codes map-like representations in a virtual environment specified  
24 by the relative positions of three objects. Representational similarity analysis revealed an  
25 object-based spatial representation in the hippocampus (HPC) when participants located  
26 themselves within the environment, while the medial prefrontal cortex (mPFC) represented it  
27 when they recollected a target object's location relative to their self-body. During recollection,  
28 task-dependent functional connectivity increased between the two areas implying exchange  
29 of self- and target-location signals between the HPC and mPFC. Together, the coherent  
30 cognitive map, which could be formed by objects, may be recruited in the HPC and mPFC for  
31 complementary functions during navigation, which may generalize to other aspects of  
32 cognition, such as navigating social interactions.

33

34 **Introduction**

35 During navigation, it is necessary to locate our self-position in the current spatial  
36 environment as well as to locate the objects relative to the self-body (i.e., egocentric location).  
37 To conduct each of the two mental operations, we need map-like representations, called  
38 “cognitive map” in our brain (Tolman, 1948). After the discovery of “place cells,” the  
39 hippocampus (HPC) of the medial temporal lobe (MTL) has been considered responsible for  
40 the cognitive map (Buffalo, 2015), and crucial contributions of the HPC to spatial memory  
41 have also been reported by animal model studies that evaluated behavioral patterns of rodents  
42 with an inactivated HPC using maze tasks (Nakazawa et al., 2002; Packard and McGaugh,  
43 1996; Redish and Touretzky, 1998) as well as human studies that demonstrated the  
44 relationship between HPC volume in individual subjects and their amounts of experience  
45 exploring spatial environments (Woollett and Maguire, 2011; Schinazi et al., 2013, e.g.,  
46 London taxi drivers). However, it remains largely unknown how neural substrates of the  
47 cognitive map are involved in the two mental operations required to locate specific objects  
48 within the environment. One possible reason for the difficulty in addressing this question is  
49 that despite extensive studies on the spatial elements related to the cognitive map (e.g., self-  
50 location, head-direction etc.) (O’Keefe and Dostrovsky, 1971; Vass and Epstein, 2013;  
51 Chadwick et al., 2015; Buffalo, 2015; McCormick et al., 2018;), there is still a lack of  
52 sufficient isolation and characterization of the neural signal of the cognitive map under the  
53 previous research paradigms.

54 In addition to the HPC, the role of the medial prefrontal cortex (mPFC) in goal-  
55 directed planning during navigation was demonstrated by a previous human fMRI study that  
56 showed increased connectivity between the HPC and mPFC (Brown et al., 2016). The mPFC  
57 has been long considered as a member of the core-brain system in the retrieval of episodic  
58 memory (Konishi et al., 2000; Eichenbaum, 2017; McCormick et al., 2018), which is an

59 autobiographical memory consisting of spatial, object, and temporal information (Suzuki and  
60 Naya, 2011; Naya and Suzuki, 2011; Squire and Wixted, 2011). Schacter et al. (2007)  
61 suggested an involvement of the mPFC in future-simulation processing and recollection of  
62 past episodes, which depend on mnemonic information stored as declarative memory  
63 including both episodic and semantic memory. Recently, they also showed increased  
64 connectivity between the HPC and mPFC during future simulation (Campbell et al., 2018).  
65 This preceding literature suggests that the HPC and mPFC, which belong to the default-mode  
66 network, work together when remembering stored information (e.g., cognitive map) and  
67 construct the mental representation of goal-directed information (e.g., target-location) from  
68 mnemonic information with the current context (e.g., self-location) (Schacter, 2012).  
69 However, the specific functional role of each of HPC and mPFC during the construction  
70 process (McCormick et al., 2018; Campbell et al., 2018) remain elusive, presumably because  
71 the construction of goal-directed information (e.g., spatial navigation) includes at least two  
72 mental operations described above (locating the self and locating an object target relative to  
73 self-location), as previous experimental paradigms did not dissociate these aspects of  
74 behavior.

75         To address these issues, we aimed to devise a novel 3D spatial-memory task with  
76 spatial environments defined by objects, which would enable us to identify the representation  
77 of the cognitive map and to investigate how it is related to the two mental operations (Fig. 1).  
78 We used a stimulus set consisting of three different human characters throughout the entire  
79 experiment, while the spatial configuration of the three characters was changed in a trial-by-  
80 trial manner. The spatial configuration pattern was referred to as a “*map*” in the present study  
81 (Fig. 1b). In each trial, participants encoded a *map* from the first-person’s view by walking  
82 toward the characters in one of four fixed walking directions (walking period, Fig. 1c, see  
83 Methods). Following the walking period, one human character (facing object) was presented

84 on a virtual-environment background with other characters being invisible, which gave the  
85 participants a feeling of facing the presented character in the virtual environment (i.e., facing  
86 period). After a short delay, one of the two remaining characters (targeting object) was  
87 presented without the virtual environment background, and the participants were required to  
88 remember the location of this second human character relative to their self-body (i.e.,  
89 targeting period). Thus, the two mental operations were separated into two periods within a  
90 single trial. This task design allowed us to detect the brain regions that distinguished the  
91 spatial configurations of the objects (i.e., *map*) around the participants during the facing  
92 period and targeting period separately. The results of the representational similarity analysis  
93 (RSA; see Methods for details) (Kriegeskorte et al., 2012; Kriegeskorte et al., 2008) showed  
94 that the spatial environment defined by the three objects were represented in the HPC during  
95 the facing period, while it was represented in the mPFC during the targeting period,  
96 suggesting different contributions of the object-based cognitive map to the recollection  
97 between the two brain areas of the default-mode network.

98 **Results**

99 The experiment was conducted over two days with 19 participants. On the first day, the  
100 participants were familiarized with the 3D virtual environment and the three human  
101 characters through a head-nodding detection (HND) task (Fig. S1a). In this task, the  
102 participants had the same walking experience as in the spatial-memory task but were  
103 subsequently asked to indicate whether one of the three characters in a photo had nodded its  
104 head during the walking period. On the second day, the participants performed the spatial-  
105 memory task during fMRI scanning (Fig. 1a). To prevent voluntary memorization of the  
106 spatial relationship of the human characters during the walking period, the HND trials were  
107 pseudo-randomly mixed with the spatial-memory trials, and the participants were instructed  
108 to focus on head-nodding of the human characters during the walking period in all trials. In  
109 each trial, its trial-type (i.e., HND or memory task) became distinguishable only after the  
110 walking period by subsequent stimuli. All participants exhibited ceiling performance with a  
111  $93.6\% \pm 0.02\%$  correct rate (mean  $\pm$  SE,  $n = 19$ ) for the spatial-memory task and no  
112 significant difference was found among each of the task parameters (e.g., maps, walking  
113 directions) (Fig. S1c). All participants also showed accuracy that was significantly higher  
114 than chance level (50%) in both the head-nodding and no head-nodding trials in the HND  
115 task (Fig. S1a). Attempts to memorize the spatial arrangements of the human characters  
116 during scanning were examined using post-scanning questionnaires. All participants reported  
117 that they did not make any voluntary effort to memorize the spatial relationship of the three  
118 human characters nor utilize any special strategy for memorizing it (Table S2). It should be  
119 noted that no participant was able to recall the number of map patterns they experienced in  
120 the experiment even though only three of the six possible patterns of maps were repeatedly  
121 presented to each participant. In addition, no significant changes in performance was found  
122 across four experimental sessions (Fig. S1b;  $F(3,72) = 0.38$ ,  $P = 0.76$ ), suggesting that the

123 participants performed the spatial-memory task with high-performance from the beginning  
124 and did not learn to use a systematic strategy to improve their performance during the  
125 sessions. These behavioral results suggest that the present experimental design allowed us to  
126 investigate neural operations for the retrieval after the participants automatically encoded the  
127 spatial configuration of three human characters during the walking period when viewing the  
128 characters attentively to detect head-nodding.

129

### 130 **Neural representation of the object-based cognitive map**

131 To decode the map information across the whole brain, we conducted searchlight-based RSA,  
132 which examined the multi-voxel pattern similarity between trial pairs in the “same map” and  
133 compared it with that in the “different map” condition across each brain voxel by drawing a 6  
134 mm radius sphere with each voxel in the spherical center. Map information was decoded  
135 regardless of other task parameters such as the walking direction or the identity of the facing  
136 character by balancing the number of trials with other task parameters across the same and  
137 different map conditions in the experimental design as well as excluding the effects of other  
138 task parameters in the regression analysis (see Methods for details, Table. S1 for the regressor  
139 list and the averaged  $r^2$  among the regressors in each GLM).

140 We first assessed the map representation during the facing period (4.0 s including the  
141 subsequent delay; Fig. 2a), in which the participants oriented themselves to a presented  
142 human character in the 3D environment. We found a cluster located in the left middle HPC  
143 (mHPC; Fig. 2b,  $P < 0.01$ , voxel-wise threshold;  $P < 0.05$ , cluster-corrected for multiple  
144 comparison), suggesting that the map defined by multiple objects is represented in the HPC.  
145 In addition to the mHPC, clusters were revealed in the insula, angular gyrus, and superior  
146 temporal cortex (Fig. S2b,  $P < 0.01$ , voxel-wise threshold;  $P < 0.05$ , cluster-corrected for  
147 multiple comparison; see discussion). We next assessed the map representation during the

148 targeting facing period (4.0 s including the subsequent delay), in which the participants  
149 remembered the location of a target character relative to their self-body (egocentric target  
150 location). In contrast to the facing period, we found clusters representing the map information  
151 mainly in the mPFC including the rectus and BA 10 (Fig. 2c) rather than in the HPC during  
152 the targeting period. A peak was revealed in the rectus ( $x = 4, y = 50, z = -18$ ;  $t$  value: 5.62).  
153 Outside of the mPFC, we found clusters in the precuneus and middle temporal gyrus, and the  
154 inferior frontal cortex (Fig. 2c, Fig. S2c;  $P < 0.001$ , voxel-wise threshold;  $P < 0.05$ , cluster-  
155 corrected for multiple comparison). These three brain regions have been consistently reported  
156 to be involved in scene construction during recalling of past experience and imagination of  
157 new experiences (Hassabis and Maguire, 2007; Bird et al., 2010; Gaesser et al., 2013), which  
158 is consistent with the post-scanning report that all participants recalled and also imagined the  
159 egocentric positions of the three human characters during the targeting period.

160 To validate the searchlight-based RSA results showing the map representations in the  
161 HPC and mPFC, we conducted a region of interest (ROI)-based RSA using a total of four  
162 masks consisting of both right and left hemispheres of the mHPC and rectus (mPFC) that  
163 derived from the automated anatomical labeling (AAL, Fig. S4a, bottom panel) template. In  
164 each ROI, we examined the multi-voxel pattern similarity in the “same-map” condition and in  
165 the “different-map” condition separately. These similarities were then compared with chance  
166 levels that were estimated as mean values among 5,000 of trial-based permutation results (see  
167 Methods).

168 In the left mHPC, the similarity was significantly higher than the chance level in the  
169 same-map condition during the facing period (Fig. 2d;  $t(18) = 3.26, P = 0.016$ , bonferroni  
170 corrected for multiple comparisons ( $n = 4$ )), while it was significantly lower than the chance  
171 level in the different-map condition ( $t(18) = -3.26, P = 0.016$ ). This tendency was also  
172 observed during the targeting period, although the similarities for neither of the two



173 conditions reached a statistical significance (same-map:  $t(18) = 1.99$ ,  $P = 0.062$ ; different-  
174 map:  $t(18) = -1.99$ ,  $P = 0.062$ ). In contrast to the left hemisphere, the similarities did not  
175 differ from the control levels in any combination of the conditions and periods in the right  
176 mHPC (Fig. 2d), suggesting a striking laterality effect on the map representation in the HPC.  
177 On the other hand, both hemispheres of the rectus showed significantly higher and lower  
178 similarities than the control levels in the same-map (the left rectus:  $t(18) = 3.68$ ,  $P = 0.007$ ;  
179 the right rectus:  $t(18) = 4.50$ ,  $P = 0.001$ ) and different map conditions (the left rectus:  $t(18) =$   
180  $-3.68$ ,  $P = 0.007$ ; the right rectus:  $t(18) = -4.49$ ,  $P = 0.001$ ), respectively, only during the  
181 targeting period. This tendency was observed during the facing period only in the left  
182 hemisphere, although the similarities for neither of the two conditions reached a statistical  
183 significance (same-map:  $t(18) = 1.60$ ,  $P = 0.126$ ; different-map:  $t(18) = -1.60$ ,  $P = 0.126$ ). The  
184 ROI-based RSA thus confirmed the results of the searchlight-based RSA, indicating that  
185 while the cognitive map was represented in the HPC during the facing period, the mPFC  
186 represented it during the targeting period. It should be noted here that the map representation  
187 in the different brain areas (i.e., HPC and mPFC) during the facing and targeting periods  
188 could not be explained by different background images during the two periods themselves  
189 (i.e., environment vs. noise) because the RSA revealed brain regions that discriminated trials  
190 with different map information during each period in which the same background was  
191 presented. Taken together, the HPC and mPFC may represent the cognitive map information  
192 for the different functional operations. Some temporally-overlapping map representation in  
193 the two brain areas may implicate an interaction to share the map information between them  
194 although it did not reach a statistical significance (i.e., map representation in the mPFC and  
195 HPC during the facing and targeting periods, respectively).

196

197 **Input signal for the map construction**

198 To examine possible signal input from the MTL sub-regions to the left mHPC for the map  
199 construction during the facing period, we examined the neural representation of the facing-  
200 character identity and walking direction that the participants perceptually and/or mentally re-  
201 experienced based on their post-scanning reports (Table S2; Fig. S3a). The results revealed  
202 that the bilateral perirhinal cortex (PRC) encoded character identity (Fig. S3b;  $P < 0.001$ ,  
203 initial threshold;  $P < 0.05$ , cluster-corrected for multiple comparison) (Naya et al., 2001;  
204 Suzuki and Naya, 2014), while the parahippocampal cortex (PHC) and left retrosplenial  
205 cortex (RSC) encoded the walking directions reflecting the spatial layout of one empty and  
206 three occupied positions perceived by the participants during the walking period (Fig. 1c). In  
207 the HPC, the left posterior HPC (pHPC) selectively represented the spatial layout but not the  
208 character identity, while the bilateral anterior HPC (aHPC) revealed clusters for both  
209 character identity and spatial layout (Fig. S3b). These results were consistent with the notion  
210 of the “two cortical systems” model suggesting that object identity and spatiotemporal  
211 context are processed in two separate neural systems with the PRC and PHC-RSC as the core  
212 brain regions, with the two different information domains interacting in the HPC (Ranganath  
213 and Ritchey., 2012). Together, the RSA analyses suggest that the MTL is associated with  
214 representing the spatial environment in the following ways: elements such as each object  
215 identity and spatial layout are represented by extrahippocampal areas while the relative  
216 relationship between multi-objects is represented in the HPC, suggesting cognitive map  
217 representation in the HPC.

218

### 219 **Current self-orientation on the map**

220 To compute the egocentric location of a target object (e.g., left, right, or back), information  
221 on the current self-position/orientation on the map is necessary (Fig. 3a). Therefore, we  
222 examined which brain regions were involved in representing such allocentric “heading-

223 direction” signals (Hargreaves et al., 2005; Wang et al., 2018). Interestingly, while no  
224 significant cluster was revealed during the facing period (facing character; Fig. 3b), robust  
225 clusters were revealed during the targeting period (Fig. 3b,  $P < 0.001$ , voxel-wise threshold;  $P$   
226  $< 0.05$ , cluster-corrected for multiple comparison). These clusters were located in the left  
227 ERC, bilateral HPC and PHC inside the MTL as well as in the lateral occipital cortex, parietal  
228 cortex, precuneus, and anterior cingulate cortex outside the MTL (Fig. 3b,  $P < 0.001$ , voxel-  
229 wise threshold;  $P < 0.05$ , cluster-corrected for multiple comparison). These results suggested  
230 that a self-orientation signal was induced during the targeting period, presumably because of  
231 the necessity to compute the egocentric target location. This interpretation is consistent with  
232 the post-scanning report in which participants reported imagining their self-orientation on the  
233 map only during the targeting period.

234

### 235 **Remembering the egocentric location of a target object**

236 Next, we examined which brain regions signaled the egocentric location (left, right, or back  
237 relative to self-body) of a target object (Fig. 4a). The results revealed robust clusters in both  
238 the mPFC and MTL (Fig. 4a,  $P < 0.001$ , voxel-wise threshold;  $P < 0.05$ , cluster-corrected for  
239 multiple comparison). In the mPFC, we identified the rectus, medial/superior orbitofrontal  
240 cortex, and olfactory cortex. In the MTL, clusters were found in the anterior HPC. Apart from  
241 the mPFC and MTL, clusters were also found in the lateral occipital cortex, inferior parietal  
242 cortex, anterior temporal lobe, premotor cortex, and IPFC (middle and superior PFC). We  
243 also found clusters in the precuneus and posterior parietal cortex, which were previously  
244 reported to represent the egocentric location (Chadwick et al., 2015). The widely distributed  
245 clusters may indicate that the brain regions representing the egocentric target locations can be  
246 involved in either generation of the egocentric-target-location information from multiple  
247 pieces of information (cognitive map, self-orientation, and target character identity) or its

248 maintenance while preparing for the following response. These distinct functions might be  
249 supported by three different large-scale brain networks: the dorsal attention network,  
250 frontoparietal control network, and default-mode network (Spreng and Schacter., 2011). In  
251 contrast to the robust signal observed across different brain networks for egocentric target-  
252 location, no cluster was revealed for allocentric target location relative to the spatial layout of  
253 the characters (Fig. 4b,  $P < 0.001$ , voxel-wise threshold;  $P < 0.05$ , cluster-corrected for  
254 multiple comparison), which implies that the target location may be directly retrieved in the  
255 form of egocentric coordinates rather than via its allocentric representation.

256

257 **Increased default-mode network connectivity while locating a target compared with**  
258 **self-locating**

259 The present results showed that the MTL and mPFC signaled a coherent map coding a spatial  
260 relationship of the three human characters during the different time periods in which different  
261 task demands were required (i.e., self-locating and target-locating). In addition, the MTL and  
262 mPFC signaled the different location information even during the same targeting period;  
263 MTL areas tended to represent self-orientation while the mPFC tended to represent  
264 egocentric target location. To investigate how the different functional contributions of the  
265 MTL and mPFC were substantiated by whole brain large-scale networks, we manually  
266 segmented the MTL sub-regions in each participant's native space (Fig. S4a, top panel), and  
267 conducted a task-based functional connectivity analysis using each of MTL and mPFC sub-  
268 regions as seed (six and four, respectively). For each seed, the mean regional bold signals  
269 associated with two TRs in each of facing and targeting period were estimated in each trial,  
270 and concatenated across trials to make its task-based time course, which contains 72 time  
271 points (i.e., 2 TRs  $\times$  36 trials) in each session. The task-based time course of the regional  
272 signal for each seed was correlated with each voxel's time course outside the seed and then

273 was averaged across the four sessions for each participant, generating seed-based  
274 connectivity maps for each of facing and targeting periods (Ranganath et al., 2005). Then, we  
275 compared the connectivity between the two periods across the participants using a  
276 permutation test (see Methods for details).

277 First, we examined the connectivity between the MTL and mPFC subregions for each  
278 of task demands, the result indicated a significantly larger connectivity between the medial  
279 orbital frontal cortex and the MTL subregions in the targeting period relative to the facing  
280 period. (aHPC:  $t(18)=4.75$ ,  $P=0.003$ , pHPC:  $t(18)=3.96$ ,  $P=0.02$ , PHC:  $t(18)=6.85$ ,  $P<0.001$ ,  
281 bonferroni corrected for multiple comparison ( $n=24$ )). In addition, both the MTL and mPFC  
282 showed significantly larger connectivity to brain areas that belong to the default-mode  
283 network and those to the dorsal attention network during the targeting period compared to the  
284 facing period (Fig. 5b,  $P < 0.001$ , voxel-wise threshold;  $P < 0.05$ , cluster-corrected for  
285 multiple comparison). By contrast, both the MTL and mPFC showed significantly larger  
286 connectivity to the frontoparietal control network during the facing period relative to the  
287 targeting period (Fig. 5a,  $P < 0.001$ , voxel-wise threshold;  $P < 0.05$ , cluster-corrected for  
288 multiple comparison). These results suggest that both the MTL and mPFC changed their  
289 connectivity to the three functional networks depending on the task demands. We next  
290 evaluated the task-based functional connectivity during each task period based on the three  
291 functional network masks (Fig. S4b). This ROI analysis revealed that the default-mode  
292 network was positively correlated with the MTL ( $t(18) = 7.98$  for average across the sub-  
293 regions within MTL,  $P < 0.001$ ) and mPFC ( $t(18) = 9.63$  for average across the sub-regions  
294 within mPFC,  $P < 0.001$ ) for both time periods with a significant increase during the targeting  
295 period (Fig. 5c & Fig. S5, top panel;  $F(1,72) = 4.51$ ,  $P = 0.03$ ), regardless of the seeds (MTL  
296 or mPFC;  $F(1,72) = 0.00$ ,  $P=0.98$ ). In contrast, the frontoparietal control network showed  
297 significantly negative connectivity with the MTL ( $t(18) = -10.50$ ,  $P < 0.001$ ) and mPFC ( $t(18)$

298 = -6.55,  $P < 0.001$ ) during both task periods, this negative connectivity was stronger during  
299 the targeting period (Fig. 5c  $F(1,72) = 5.58$ ,  $P = 0.02$ , also see Fig. S5, middle panel;). These  
300 results suggest that the default-mode network contributes more to the retrieval of the target  
301 location than the self-location to an external reference. Interestingly, despite both the MTL  
302 and mPFC being part of the default-mode network, they showed opposite connectivity  
303 patterns to the dorsal attention network during both periods (Fig. 5c & Fig. S5, bottom panel;  
304  $F(1,72) = 55.07$ ,  $P < 0.001$ ); the MTL positively with the network while the mPFC negatively  
305 correlated with it. The connectivity between the MTL and the dorsal attention network  
306 increased from the facing to targeting period ( $F(1,72) = 8.43$ ,  $P = 0.005$ ). These results  
307 suggested that the dorsal attention network, which contains the superior parietal lobule (SPL)  
308 that represented egocentric target location (Fig. 4a), showed increased coupling with the  
309 MTL during the targeting period.

310 **Discussion**

311 In this study, we examined neural representations of space defined by three objects and found  
312 that both the HPC and mPFC represented the object-based space around the participants.  
313 Interestingly, the HPC represented the object-based map when the participants locate their  
314 self-body in the environment constructed by the three objects, while the mPFC represented  
315 the map when the participants remembered the location of a target object relative to the self-  
316 body. These results suggest that the cognitive maps in different brain regions play different  
317 functional roles. In addition, during the targeting period, we found differential spatial  
318 representations across the MTL and mPFC: the MTL generally reinstated self-orientation,  
319 while the mPFC represented egocentric target location relative to self-location. Increased  
320 functional connectivity was observed between the MTL and mPFC under the necessity of the  
321 retrieval of the target location from the stored memory (targeting period) compared to when  
322 they actually faced the reference object to locate their self-body (facing period). These results  
323 suggest that mental representations of the external world formed by the coherent space and its  
324 constituent elements may be shared in the default-mode network including the MTL and  
325 mPFC. The special role of the mPFC in this scheme might be to select the object location  
326 based on the mnemonic information including the cognitive map and current self-location on  
327 it, which might be propagated from the MTL.

328 To examine the representation of spatial “maps” (Fig. 1b), the present task was  
329 designed to cancel out effects of a particular encoding experience related with the walking  
330 direction as well as a particular object identity that the participants viewed during the facing  
331 and targeting periods in each trial by balancing number of trials with each of those  
332 confounding factors in each map (see Methods). Therefore, the neural representation of the  
333 map information revealed by the RSA could not be explained by perceptual information in  
334 the present study. Moreover, the participants always stood on the center of the virtual

335 environment during the facing and targeting periods, during which the map effect was  
336 examined. Because of this task design, the map information does not directly indicate self-  
337 location information like place fields of place cells in the HPC (O'Keefe and Dostrovsky,  
338 1971). On the other hand, the representations of place-fields are reportedly influenced by the  
339 animal's cognitive map, and the existence of cognitive maps could be most clearly  
340 demonstrated by a phenomenon known as "remapping", which reportedly occurs in  
341 populations of place cells in the rodent HPC (Moser et al., 2017). Therefore, it might be  
342 reasonable to interpret the map representations in the left mHPC during the facing period as  
343 experimental evidence of "remapping" of place cells in the human HPC even though the  
344 participants stood in the same position. However, holding this interpretation predicts that  
345 human place cells are localized in the left mHPC. This prediction is against consistent  
346 evidence from previous human studies reporting that the right HPC was more involved in  
347 encoding and retrieving spatial information than the left HPC (Abrahams et al., 1997;  
348 Maguire et al., 1997; Ekstrom et al., 2003; Doeller et al., 2008; Schinazi, 2013). The other  
349 possible interpretation for the map representation in the left mHPC is that it may encode an  
350 allocentric spatial relationship of the three objects itself. This interpretation is consistent with  
351 previous human imaging studies reporting contributions of the left HPC to the imagination of  
352 visual scenes, which could be constructed from multiple spatial elements (Addis et al., 2007;  
353 Bird et al., 2010). The specific role of the left HPC in relational memory was also reported in  
354 non-spatial information domains, including associative learning (Kumaran et al., 2009;  
355 Suarez-Jimenez et al., 2018) and social interactions (Tavares et al., 2015;). Taken together, it  
356 might be more reasonable to interpret that the clusters in the left mHPC was related to a  
357 coherent space constructed by the multiple objects rather than its influence on representations  
358 of individual spatial elements such as self-location or head direction. RSA also suggested the  
359 involvement of the PRC and PHC in MTL signaling the object identity and egocentric view



360 of their spatial layout, respectively, which might be used for constructing the coherent map  
361 from its constituents in the left mHPC. Future studies should address how the coherent map  
362 can be constructed by multiple objects in the MTL.

363 In contrast to the facing period, the representation of the map information was found  
364 in the mPFC but not in the HPC during the targeting period. In addition, the mPFC signaled  
365 the egocentric location of a targeting object, while the MTL concurrently signaled the self-  
366 orientation. Involvement of the mPFC in constructing goal-directed information in the current  
367 context is consistent with accumulating evidence showing that the mPFC contributes to  
368 decision making or action selection (Saxena et al., 1998; Gallagher et al., 1999; Feierstein,  
369 2006; Spiers and Maguire, 2007; Kable and Glimcher, 2009; Young and Shapiro, 2011;  
370 Balaguer et al., 2016; Yamada et al., 2018). These previous studies consistently supported the  
371 notion that the mPFC function becomes obvious when an appropriate selection requires  
372 mnemonic information in addition to incoming perceptual information (Bradfield, 2015). In  
373 this study, together with perceptual information responsible for target object identity,  
374 mnemonic information such as the map information and self-orientation was required to solve  
375 the task. Considering that the MTL could provide all the necessary mnemonic information, a  
376 reasonable interpretation is that the mPFC was involved in the selection of a target location  
377 among alternatives rather than the recollection or generation of it.

378 In addition to the HPC and mPFC, the map information has been observed in other  
379 brain areas such as the angular gyrus (Seghier, 2013; Price et al., 2016), lateral temporal  
380 gyrus (Karnath, 2001; Himmelbach et al., 2006), and precuneus (Cavanna and Trimble, 2006)  
381 that also belong to the default-mode network. The brain areas in the default-mode network,  
382 particularly the MTL sub-regions except for the PRC represented self-orientation during the  
383 targeting period. On the other hand, RSA analysis showed that the representation of the

384 egocentric target object location recruited widely-distributed brain regions, which belong not  
385 only to the default-mode network but also to the dorsal attention network and frontoparietal  
386 control network. The increased functional connectivity between the MTL and the brain  
387 regions of dorsal attention network as well as the mPFC suggest that the egocentric target  
388 location signal is transmitted from the mPFC to the dorsal attention network, such as the SPL  
389 (Evans et al., 2016), via the MTL, which implies a pivotal functional role of MTL as a hub of  
390 mental representation of object-related (e.g., identity and location) signals. This signal  
391 transmit across different brain networks may be related with the fact that the egocentric target  
392 location was the main behaviorally relevant feature in the present task. These results contrast  
393 with the present result that no brain regions represented the allocentric target location relative  
394 to the spatial layout of the characters, which was not required to answer in the task.

395         Interestingly, the frontoparietal control network showed a strong negative correlation  
396 with both the MTL and mPFC during both the facing and targeting periods, although the  
397 IPFC in the frontoparietal control network represented both the map information and  
398 egocentric direction during the targeting period. In addition, the IPFC represented walking  
399 direction as well as character identity during both periods. These results suggest that the IPFC  
400 computes the target location independently of the default-mode network. The parallel  
401 contributions of the IPFC and MTL-mPFC in choosing the target location may reflect their  
402 different cognitive functions (Jimura et al., 2004). IPFC has long been considered as a center  
403 of executive functions (Funahashi, 2017; Miller et al., 2018) equipped with working memory  
404 (Andrews et al., 2011; Barbey et al., 2013; Brunoni and Vanderhasselt, 2014; Funahashi,  
405 2017). In human fMRI studies, the IPFC has been shown to contribute to the retrieval of task-  
406 relevant information when more systematic thinking is required (Epstein et al., 2017; Javadi  
407 et al., 2017). In the present study, the behavioral task was designed to ensure participants  
408 neither actively maintained a spatial configuration of the human characters during the

409 walking period nor any systematic strategy to solve the task, which was confirmed by the  
410 post-scanning test results. The greater signal for the cognitive map and the egocentric target  
411 location in the mPFC than that in the IPFC may reflect that the current spatial memory task  
412 was enough easy to allow participants to depend only on the involuntary encoding and  
413 subsequent memory retrieval for their top-ceiling performance (Epstein et al., 2017; Javadi et  
414 al., 2017).

415         In contrast to previous memory/navigation studies, which examined brain functions  
416 using spatial environments consisting of immobile landmarks (e.g., stores) and/or landscapes  
417 (e.g., mountains) (Bird et al., 2010; Woollett and Maguire, 2011; Schinazi et al., 2013;  
418 Chadwick et al., 2015; Brown et al., 2016), the present study used a spatial environment  
419 constructed by only mobile objects that could become targets and references of self-location  
420 as well as determine the space (i.e., map) around oneself. This task design allowed us to  
421 extract a mental representation of the spatial environment consisting of the minimum  
422 essential constituents. This reductionist method could be useful for future studies  
423 investigating the construction and functional mechanisms of a cognitive map because of its  
424 simplicity. One critical concern might be whether the findings discovered by this reductionist  
425 method can be applied to a more complicated cognitive map consisting of large numbers of  
426 immobile spatial elements, which could be learned through extensive explorations over a  
427 long time period (e.g., the city of London) (Woollett and Maguire, 2011). Another related  
428 concern might be whether our brain system holds only one cognitive map or multiple ones at  
429 a time (Meister and Buffalo, 2018). For example, we may hold an object-based cognitive map  
430 consisting of relevant mobile objects such as same species, predators, and foods, while we  
431 may also hold the other cognitive map consisting of landmarks, landscapes and other  
432 immobile objects such as trees. Future studies should address the relationships of different

433 types of cognitive maps (e.g., mobile vs immobile, short-term vs. long-term) and their  
434 underlying neural mechanisms.

435 The present study found neural representations of the space specified by objects  
436 around us. This object-based cognitive map seems to interact with representation of self-  
437 location in HPC and to mediate a selection of egocentric target-location in mPFC, which  
438 would serve for leading us to the goal position. In addition to the spatial navigation, an  
439 existence of the object-based cognitive map may equip us with a space representation for  
440 persons separately from the background, which may serve for our social interactions  
441 (Damasio et al., 1994; Stolk et al., 2015) as well as the encoding and retrieval of episodic  
442 memory (Tulving, 2002; Squire and Wixted, 2011).

443

#### 444 **Supplemental Information**

445 Supplemental Information includes six figures, two tables and two videos. The videos contain  
446 trial examples for Day 1 and Day 2. In the video of day 1, please note we only used examples  
447 of correct trials in which a green square of line was presented as feedback after the  
448 participant's response. File size: 21.5 MB; Video duration: 1.23 minute; File format: .mp4;  
449 Video codec: H.264; Aspect ratio: 1024 x 768.

#### 450 **Author Contributions**

451 B.Z. and Y.N made the experimental design; B.Z. conducted all experiments and data  
452 analysis under supervision of Y.N.; B.Z. and Y.N. wrote the paper.

#### 453 **Acknowledgments**

454 The present study was funded by National Natural Science Foundation of China Grant  
455 31421003 (to Y.N.). Computational work was supported by resources provided by the High-  
456 performance Computing Platform of Peking University. We thank Li Sheng and Sun Pei for

457 helpful discussions, we also thank Arielle Tambini, Lusha Zhu, Koji Jimura, Rei Akaishi and  
458 Cen Yang for comments on an early version of the manuscript.

459 **Figures**

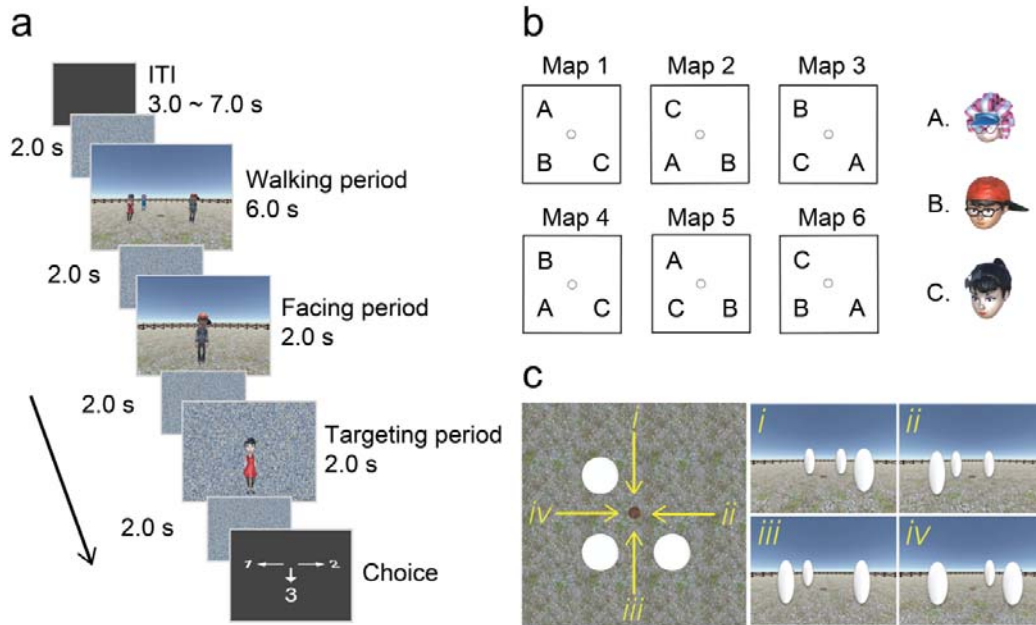

460

461 Figure 1: Task design. (a) spatial-memory task. Each trial consisted of three periods. In the  
462 walking period, participants walked toward three human characters using the first-person  
463 perspective and stopped on a wood plate. In the facing period, one of the human characters  
464 was presented, indicating the participant's current self-orientation. In the targeting period, a  
465 photo of another character was presented on the scrambled background. The participants  
466 chose the direction of the target character relative to their body upon presentation of a  
467 response cue. (b) Maps were defined by the relative position of the three human characters,  
468 while the unfilled dot represents the wood plate. (c) The walking directions were defined by  
469 the spatial layout of the three human characters from the participant's first-person perspective.

470

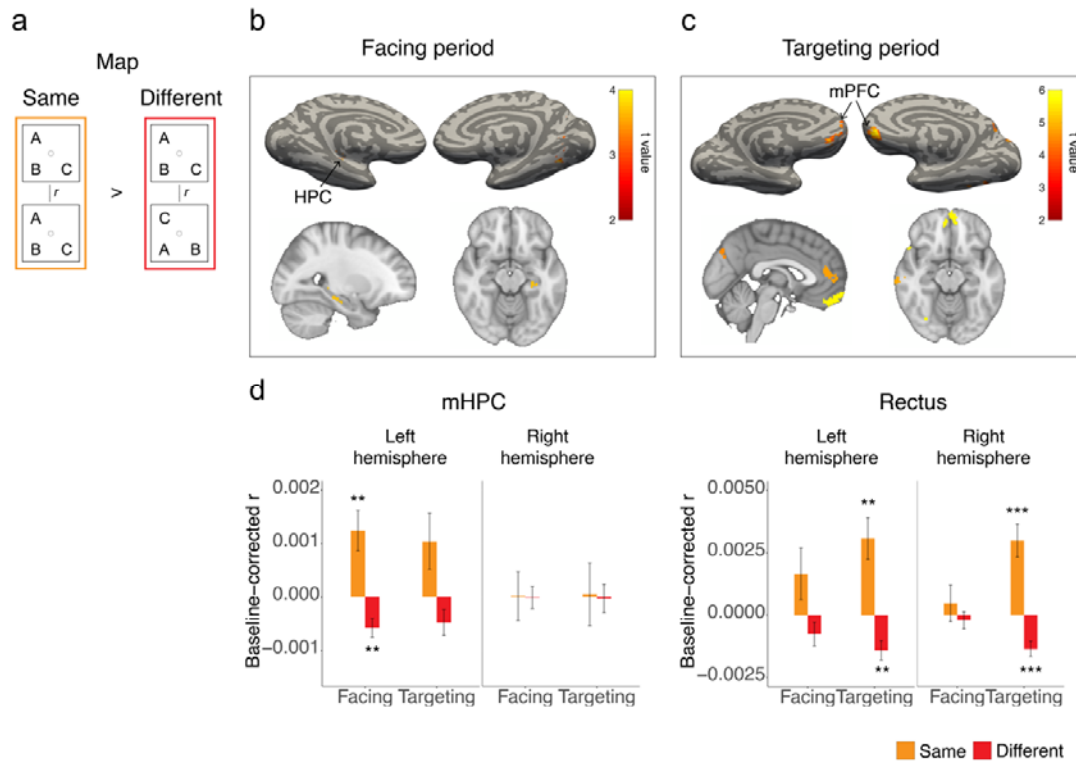

471

472 Figure 2: Neural representation of cognitive map in MTL and mPFC. (a) Schematic

473 representation of decoding the maps using RSA. (b) In the facing period, RSA revealed a

474 cluster in the left middle HPC (mHPC;  $t$  value: 3.84; MNI coordinates: -28, -25, -16; shown

475 on sagittal and transverse section) within the MTL ( $P < 0.01$ , initial threshold;  $P < 0.05$ ,

476 cluster-corrected for multiple comparison). (c) In the targeting period, clusters were revealed

477 in the mPFC ( $P < 0.001$ , initial threshold;  $P < 0.05$ , cluster-corrected for multiple

478 comparison). The peak was revealed in the rectus within the mPFC ( $t$  value: 5.62; MNI

479 coordinates: 4, 50, -18). (d) The left mHPC and bilateral rectus revealed a significantly higher

480 similarity than chance level in the “same-map” condition during facing and targeting period,

481 respectively (the left mHPC:  $t(18) = 3.26$ ,  $P = 0.016$ ; the left rectus:  $t(18) = 3.68$ ,  $P = 0.007$ ;

482 the right rectus:  $t(18) = 4.50$ ,  $P = 0.001$ ; bonferroni corrected for multiple comparisons).

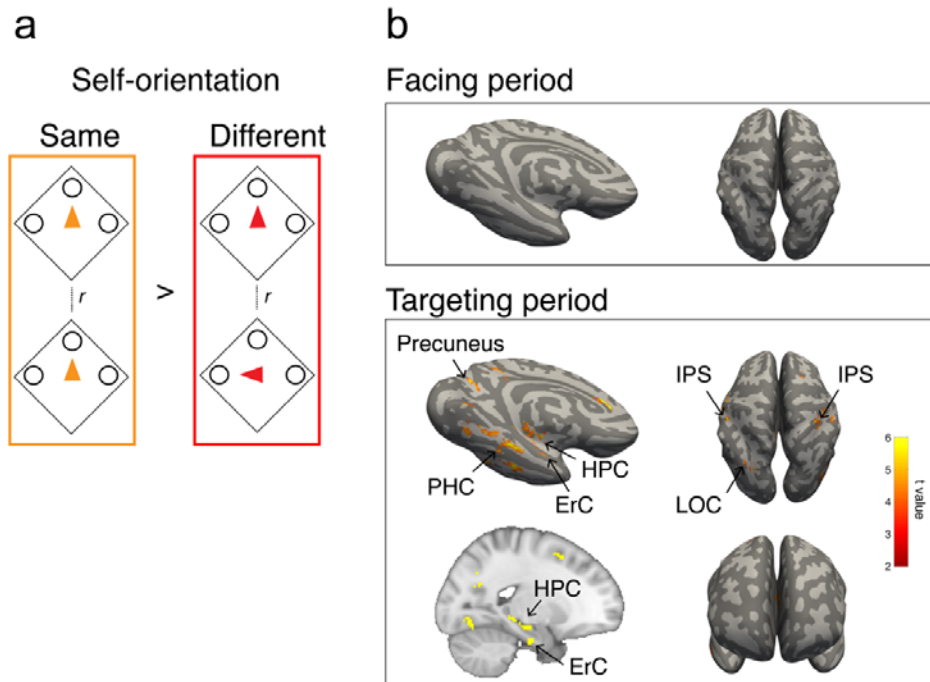

483

484 Figure 3: Neural representation of self-orientation on cognitive map. (a) Schematic  
485 representation of decoding participants' self-orientation. (b) In the facing period, no cluster  
486 was revealed even with the use of a more liberal threshold ( $P < 0.01$ , initial threshold;  $P <$   
487  $0.05$ , cluster-corrected for multiple comparison). In the targeting period, clusters were  
488 revealed in the MTL (bilateral HPC, PHC, and left ErC) and self-motion areas (inferior  
489 parietal cortex, RSC, and lateral occipital cortex).



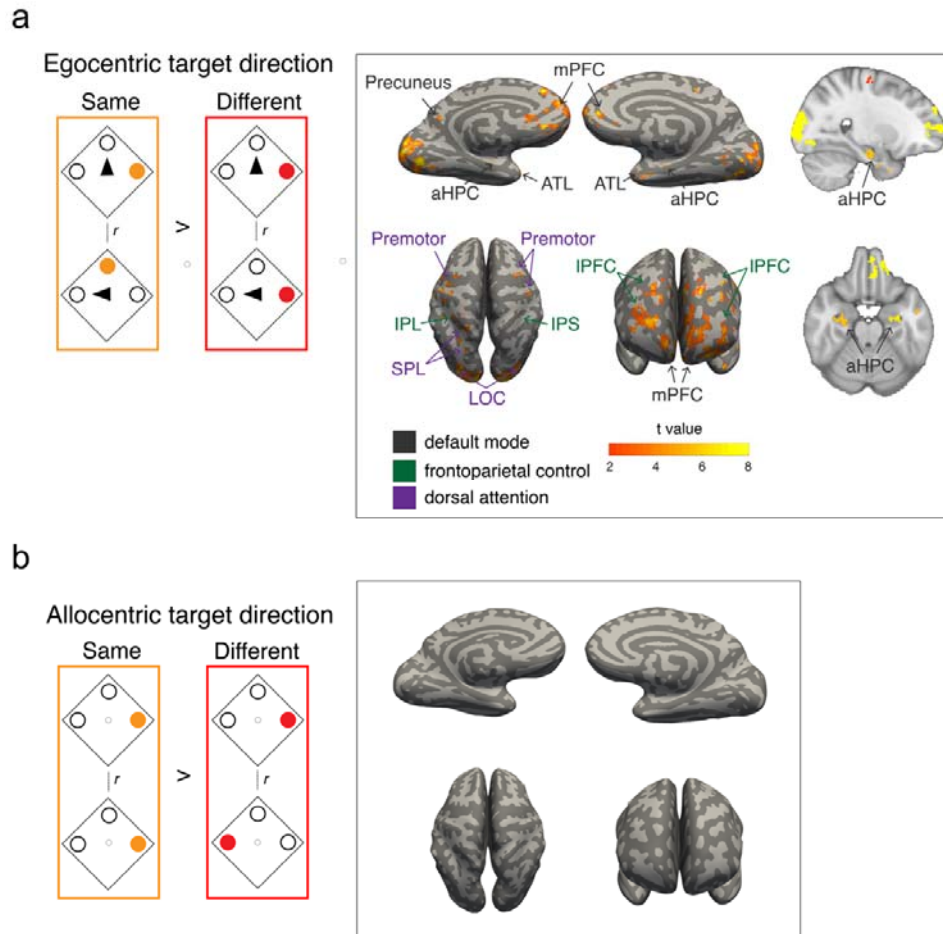

490

491 Figure 4: Neural representation of retrieved egocentric target location. (a) Left panel:  
492 Schematic representation of decoding the egocentric direction of a target character. Right  
493 panel: Clusters were revealed across a wide range of brain areas ( $P < 0.001$ , initial threshold;  
494  $P < 0.05$ , cluster-corrected for multiple comparison). Many of the clusters belonged to one of  
495 the following three functional networks: the default-mode network, frontoparietal control  
496 network, and dorsal attention network. The aHPC is shown on sagittal and transverse section  
497 of volume image for display purpose ( $P < 0.001$ , initial threshold;  $P < 0.05$ , cluster-corrected  
498 for multiple comparison). (b) Left panel: Schematic representation of decoding allocentric  
499 direction of a target character. Right panel: No clusters were revealed even with the use of a  
500 liberal threshold ( $P < 0.01$ , initial threshold;  $P < 0.05$ , cluster-corrected for multiple  
501 comparison).

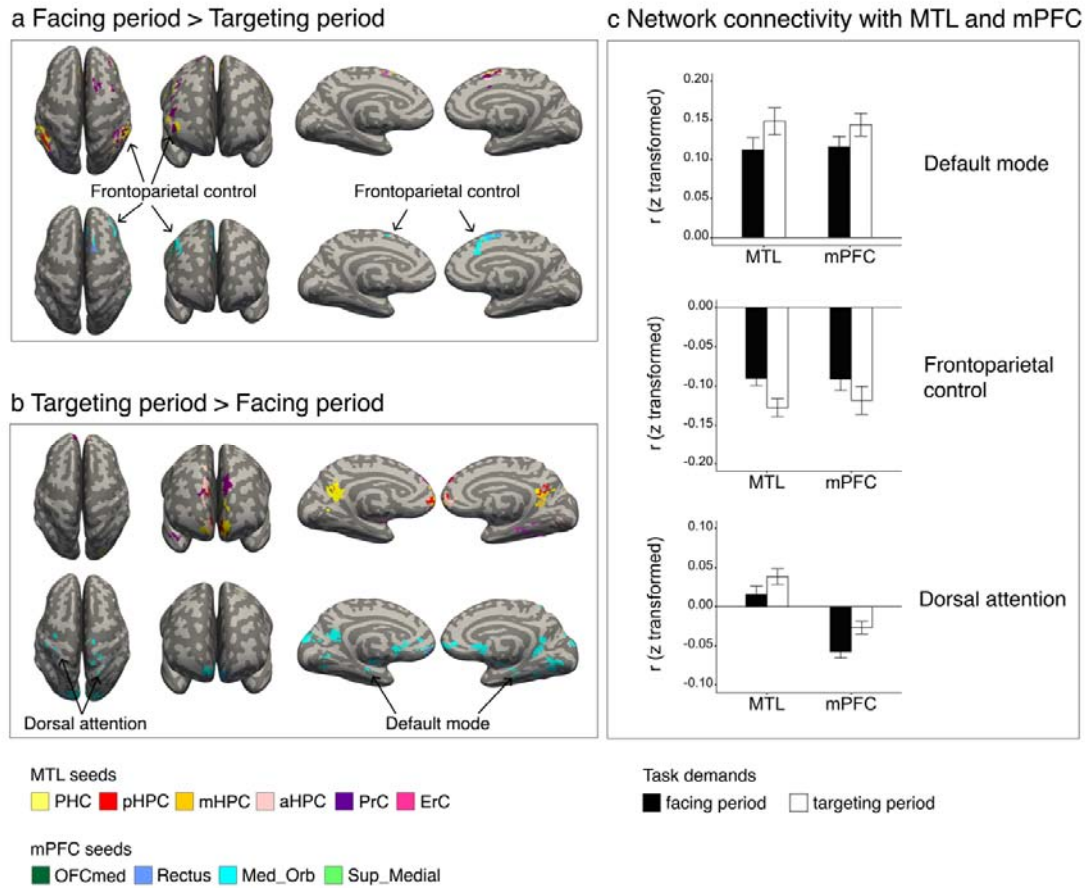

502

503 Figure 5: Increased default-mode network connectivity while locating a target compared with  
 504 locating oneself. (a) The frontoparietal control network showed enhanced connectivity  
 505 strength with the MTL and mPFC in the facing period compared to the targeting period ( $P <$   
 506  $0.001$ , initial threshold;  $P < 0.05$ , cluster-corrected for multiple comparison). (b) The default-  
 507 mode network and dorsal attention network showed enhanced connectivity strength with the  
 508 MTL and mPFC in the targeting period compared to the facing period ( $P < 0.001$ , initial  
 509 threshold;  $P < 0.05$ , cluster-corrected for multiple comparison). (c) The mean connectivity  
 510 strength of MTL and mPFC sub-regions with three networks, respectively. Note that the  
 511 connectivity between default-mode network and MTL/mPFC was examined using default-  
 512 mode network mask without the MTL/mPFC, respectively.

513

## 514 **Materials and Methods**

515

### 516 **Participants**

517 Nineteen right-handed university students with normal or corrected-to-normal vision were  
518 recruited from Peking University (12 females, 7 males). The average age of the participants  
519 was 24.9 years (range: 18–30 years). All participants had no history of psychiatric or  
520 neurological disorders and gave their written informed consent prior to the start of the  
521 experiment, which was approved by the Research Ethics Committee of Peking University.

522

### 523 **Experimental design**

524 *Virtual environment.* We programmed a 3D virtual environment using Unity software (Unity  
525 Technologies, San Francisco). The environment was designed with a circular fence as a  
526 boundary (48 virtual meters in diameter), a flat grassy ground, a uniform blue sky, and with a  
527 wood plate surrounded by four vertices of a square placed in the center (Fig. 1b, 4.7 virtual  
528 meters for side length). Three human characters (Mixamo, San Francisco,  
529 <https://www.mixamo.com>) were placed on three of the vertices in each trial. A map was  
530 defined by the relative relationship of the three human characters (Fig. 1b). From the six  
531 possible maps, three of them were pseudo-randomly selected for each participant to collect  
532 enough number of trials' data for each condition during the allowable range of scanning  
533 duration. The maps were the only environmental cues relevant to the task requirement, no  
534 distal cues were used outside the boundary. Participants performed the task using the first-  
535 person perspective with a 90° field of view (aspect ratio = 4:3), they had never seen a top-  
536 down view of the virtual environment.

537 *Walking period.* Participants walked from one of four starting locations near the circular  
538 boundary (4 virtual meters from the boundary) toward the human characters (Fig. 1c) and

539 stopped on the wood plate. The visual stimuli (spatial environment viewed from first-person  
540 perspective) were determined by the combination of the map and walking direction, in other  
541 words, each map was presented by four different visual stimuli that were determined by the  
542 starting position (Fig. 1c). Importantly, participants were blinded to the map concept  
543 throughout the task. The walking period lasted for 6.0 s, during which each character had a  
544 20.6% probability of nodding its head at a random time point between the start and end of  
545 walking. There was a 50%, 38.9%, 10.2%, and 0.9% probability for 0, 1, 2, and 3 characters  
546 to nod head in each trial; we subjectively selected a 20.6% head-nodding probability for each  
547 character to ensure an approximately equal number of trials with head-nodding and no head-  
548 nodding. During the walking period, participants were required to pay attention to the heads  
549 of the human characters rather than to memorize their spatial arrangement. The height of the  
550 participants was 1.8 virtual meters from the ground, which was the same as that of the human  
551 characters. No response was required during the walking period.

552 Two tasks were completed in two consecutive days. On day 1, the participants  
553 performed an HND task that did not include spatial-memory trials. On day 2, participants  
554 performed a spatial-memory task.

555 *Head-nodding detection (HND) task.* Participants performed 144 randomly ordered HND  
556 trials in a behavioral experimental room. In each trial, a photo of one of the characters was  
557 presented on a screen after the walking period, and participants were asked to indicate  
558 whether the character nodded its head or not (Fig. S1a). For this task, there was a 50% chance  
559 that the character in the presented photo nodded its head. Feedback was given after the  
560 participants had responded with either green (correct) or red (incorrect) photo border. The  
561 stimuli were rendered on a PC and presented on a 27-inch LCD monitor (ViewSonic XG2730)  
562 with a screen resolution of 1024 x 768. The HND task was used to examine whether

563 participants paid attention to head-nodding rather than memorizing the spatial arrangement of  
564 the characters, which would be indicated by high success rates in the head-nodding test.

565 *Spatial-memory task.* During this task, participants performed 144 spatial-memory  
566 trials (90%) and 16 HND trials (10%) that lasted ~ 70 min in an MRI scanner. Participants  
567 were notified that the remuneration depended only on the performance in the HND trials  
568 although they were also encouraged to perform the spatial memory task as best as they could  
569 (videos of trial examples are available online for both tasks). The trial-type (i.e., HND or  
570 memory task) was distinguishable after the walking period by subsequent stimuli. In the  
571 spatial-memory task, participants experienced a “facing period” and a “targeting period”  
572 sequentially after the walking period. In the facing period, their self-orientation was changed  
573 immediately to one of the human characters (facing-character) without viewpoint transition,  
574 and a character with the environment background was presented for 2.0 s with the other two  
575 characters being invisible, the participants were instructed to face the character. In the  
576 targeting period, a photo of another character (targeting-character) was presented as a target  
577 on a scabbled background for 2.0 s. Each of the three experimental periods was followed by  
578 a 2.0-s delay (noise screen). At the end of each trial, participants indicated the direction of the  
579 target character relative to their self-body by pressing a button when a cue presented on the  
580 screen; no feedback was shown for both trial-types (Fig. 1a). The spatial-memory task  
581 contained four experimental sessions, each containing a spatial information combination of 3  
582 maps x 4 walking directions x 3 facing-character identities in each session, with targeting-  
583 characters balanced across sessions. After scanning, all participants completed a post-  
584 scanning interview and reported the strategy they used to perform the task (Table. S2).

585

586 **fMRI data acquisition**

587 Imaging data were collected using a 3T Siemens Prisma scanner equipped with a 20-channel  
588 receiver head coil. Functional data were acquired with a Multi-band Echo Planer imaging  
589 (EPI) sequence (TR = 2000 ms, TE = 30 ms, matrix size:  $112 \times 112 \times 62$ , flip angle:  $90^\circ$ , gap  
590 = 0 mm; resolution:  $2 \times 2 \times 2.3 \text{ mm}^3$ , number of slices: 62, slice thickness: 2 mm, slice  
591 orientation: transversal), four experimental sessions were collected with, on average, 478,  
592 476, 473, 475 TRs, respectively. A high-resolution T1-weighted three-dimensional  
593 anatomical data set was collected to aid in registration (MPRAGE, TR = 2530 ms, TE = 2.98  
594 ms, matrix size:  $448 \times 512 \times 192$ , flip angle:  $7^\circ$ , resolution:  $0.5 \times 0.5 \times 1 \text{ mm}^3$ , number of  
595 slices: 192, slice thickness: 1 mm, slice orientation: sagittal). During scanning, experimental  
596 stimuli were presented through a Sinorad LCD projector (Shenzhen Sinorad Medical  
597 Electronics) onto a 33-inch rear-projection screen located over the subject's head with a  
598 resolution of  $1024 \times 768$  and viewed with an angled mirror positioning on the head coil.  
599

## 600 **fMRI preprocessing**

601 Functional data for each session were preprocessed independently using FSL FEAT  
602 (FMRIB's Software Library, version 6.00, <https://fsl.fmrib.ox.ac.uk/fsl/fslwiki>; Woolrich et  
603 al., 2001; Woolrich et al., 2004). For each session, the first three functional volumes were  
604 discarded to allow for T1 equilibration, and the remaining functional volumes were slice-time  
605 corrected, realigned to the first image, and high-pass filtered at 100 s. For group-level  
606 statistics, each session's functional data were registered to a T1-weighted standard image  
607 (MNI152) using FSL FLIRT (Jenkinson and Smith, 2001), and this procedure also resampled  
608 the functional voxels into a  $2 \times 2 \times 2 \text{ mm}$  resolution. For RSA, data were left unsmoothed to  
609 preserve any fine-grained spatial information (Chadwick et al., 2012). For functional  
610 connectivity analysis, data were smoothed using a 5 mm FWHM Gaussian kernel and were  
611 high-pass filtered at 0.01 Hz to remove low-frequency signal drifts.

612

### 613 **Anatomical masks**

614 We manually delineated the MTL, including the HPC, PHC, PRC, and ERC on each  
615 participant's native space using established protocols (Insausti et al., 1998; Pruessner et al.,  
616 2000; Pruessner et al., 2002; Duvernoy, 2005), as well as a delineating software ITK-SNAP  
617 ([www.itksnap.org](http://www.itksnap.org)). The HPC was further divided into its anterior, middle, and posterior parts  
618 given the anatomical and functional variability along the HPC long axis (Poppenk et al.,  
619 2013), the anterior border of pHPC and the posterior border of aHPC were defined by the  
620 appearance of the crus of the fornix and the uncus apex relative to mHPC along the coronal  
621 orientation, respectively (Pruessner et al., 2000; Poppenk et al., 2013). For PFC sub-regions,  
622 we used the AAL template (Rolls et al., 2015), and selected four mPFC sub-regions for ROI-  
623 analysis, which included the rectus, medial orbital gyrus (OFCmed), medial orbital frontal  
624 gyrus (Med\_Orb), and superior medial frontal gyrus (Sup\_Med). All ROIs were resampled  
625 and aligned with the functional volumes, and voxels outside of the brain were excluded.

626

### 627 **Representational similarity analysis (RSA)**

628 Task-relevant information was decoded using RSA. We tried to dissociate the neural effect of  
629 facing and targeting period based on 4 s duration from each period onset to the end of  
630 following noise period (Zeithamova et al., 2017). First, the trial-based multi-voxel activity  
631 patterns of two periods were obtained by creating two separate univariate general linear  
632 models (GLM). In each GLM, the 4 s blood-oxygen-level-dependent (BOLD) signals of 36  
633 trials (a session) were modeled using boxcar regressors. In addition to the 36 trial-based  
634 regressors of interest, nuisance regressors were included, which included twelve regressors  
635 for modeling the visual patterns of the walking period determined by the maps and walking  
636 directions, three for modeling the character identities in the remaining period (for example, in



637 the facing period GLM, three targeting characters were specified as nuisance regressors), four  
638 for modeling head-nodding detection trials, three for modeling 3 directional cues in the  
639 response period, and six motion parameters. This procedure generated 36 trial-based multi-  
640 voxel patterns in participant's native space (2 x 2 x 2.3 mm voxels) for each period, those  
641 multi-voxel patterns were normalized prior to subsequent analysis by subtracting the grand  
642 mean pattern of the 36 multi-voxel patterns for each session (Vass and Epstein, 2013).

643 Searchlight-based RSA. Next, we computed the representational similarity for each  
644 spatial information based on the 36 multi-voxel patterns using a searchlight-based RSA  
645 (Libby et al., 2014; Chadwick et al., 2015), which was conducted using custom Matlab  
646 (version R2018b, [www.mathworks.com/matlab/](http://www.mathworks.com/matlab/)) scripts. In detail, a sphere with a 6 mm  
647 radius was constructed (85 voxels per sphere) for each brain voxel, and the spheres near the  
648 edge of the brain with fewer than ten voxels were excluded from the analysis. The activity  
649 parameters within each sphere were extracted from each of the 36 multi-voxel patterns,  
650 resulting in a 36-column by n-row (number of voxels within the sphere) matrix. The pattern  
651 similarity was then calculated between each column-by-column pair using Pearson's  
652 correlation, and was normalized using Fisher's r-to-z transformation. This procedure finally  
653 generated a 36-by-36 correlation matrix for each period in each brain voxel. Next, given that  
654 a multi-voxel pattern contains the combination of multiple spatial information, we conducted  
655 a GLM as a regression on the correlation matrix, which included each element from one side  
656 of diagonal of the matrix but did not the diagonal elements, by specifying multiple  
657 categorical regressors to dissociate an effect of each spatial information from potential  
658 influences of others. In each regressor, either "1 (same)" or "0 (different)" were used to  
659 correspond with the correlation coefficient of a given column-to-row element of the  
660 correlation matrix. An estimated parameter of each regressor evaluated an increase or  
661 decrease in the similarity in the same condition relative to the different condition concerning



662 on the spatial information specified by the regressor. For the facing period, the GLM  
663 contained five categorical regressors, which included the (1) “map”, (2) “walking direction”,  
664 and (3) “facing-character identity”. Since the participants reported thinking about their bodies  
665 rotating between the walking direction and self-orientation relative to the environment, we  
666 also added the (4) “rotation angle” (turn left/right 45°, turn left/right 135°), and (5) their  
667 “self-orientation” into the GLM. For the targeting period, seven regressors were built, which  
668 included: (1) “map”, (2) “walking direction”, (3-4) participants’ “rotation angle” and “self-  
669 orientation”, (5) “targeting-character identity”, and (6-7) “egocentric and allocentric position  
670 of target-character”. It is important to note that the “facing-character identity” was not  
671 included in the targeting period GLM since the effect of each facing character was regressed  
672 out in the GLM computing of multi-voxel activity patterns.  $r^2$  was computed and ranged from  
673 0 to 0.03 for the facing period GLM, and 0 to 0.04 for the targeting period GLM (Table S1).  
674 Each regressor’s parameter was then assigned to the center voxel of each sphere so that a  
675 whole-brain statistical parametric map could be generated for each spatial information for  
676 each period, with those spatial representations being finally averaged across the four scanner  
677 sessions.

678 *ROI-based RSA.* To validate the representation of the cognitive map information in  
679 the HPC and mPFC suggested by the searchlight-based RSA, we further conducted an  
680 independent RSA using anatomical ROIs for the both hemispheres of mHPC and rectus. We  
681 reasoned that since searchlight analysis identifies the spatial representations as clusters in  
682 small portions of anatomical regions, if those representations are stable enough, the  
683 corresponding anatomical regions, on average, should show a clear increasing tendency in  
684 similarity when the to-be-tested spatial information are same in trial-pairs compared to a  
685 chance level such that they match the searchlight results. To test this, we separated each of  
686 mHPC and rectus into the left and right hemispheres and generated 4 anatomical ROIs, the

687 rectus masks were normalized into the participants' native space. For each ROI, the multi-  
688 voxel pattern similarity was calculated independently for "same-map" and "different-map"  
689 conditions from the correlation matrix of each period, then the similarity of both conditions  
690 was averaged across the four sessions for each participant. The chance level was determined  
691 by permutation test, in which the trial labels on the correlation matrix were shuffled before  
692 calculating the representational similarity of "same-map" and "different-map" conditions.  
693 This procedure was performed by 5000 times for each ROI, the chance level was obtained for  
694 each condition by averaging the 5000 shuffled similarity results. We then subtract the chance  
695 level from the similarity in each condition, and tested whether or not the baseline-corrected  
696 similarity is significantly different from zero across the participants using one-sample t-test  
697 (two-tailed).

698

### 699 **Functional connectivity (FC) analysis**

700 To investigate the functional networks for different task demands, we examined the whole-  
701 brain FC using each sub-region of MTL and mPFC as seed (Fig. S4a; 12 for the MTL and 8  
702 for the mPFC). In detail, we first removed the nuisance covariates from the preprocessed  
703 functional data by creating a GLM, which specified the signal averaged over the lateral  
704 ventricles, white matter, and whole brain, six motion parameters, and their derivatives as  
705 regressors. The residual signal was bandpass-filtered, leaving signals within the frequency  
706 range 0.01 to 0.1 Hz, and was shifted by two TR intervals (4 s) for subsequent analysis  
707 (Tomparry and Davachi, 2017). We computed a regional time course for each anatomical  
708 mask in each of facing and targeting period. To do this, we averaged signals over the mask at  
709 each TR within the period, and then concatenated the two TRs in one trial with those in the  
710 next trial within a session (Ranganath et al., 2005). The regional time course for each  
711 anatomical mask was correlated with the time course of each voxel in the rest of the brain,

712 resulting in a whole-brain correlation map for each period in each scanning session. The  
713 correlation maps were averaged across four scanning sessions for each participant, and were  
714 then submitted to a two-tailed t-test for group level statistics.

715 Each cluster, which derived from the contrast analysis in connectivity between facing  
716 and targeting period based on an initial threshold of  $p=0.001$ , was assigned to each of the  
717 three networks based on previous literatures: default-mode network, frontoparietal control  
718 network, and dorsal attention network (Vincent et al., 2008; Schacter et al., 2012; Gelström  
719 and Graziano., 2017). In the present study, default-mode network contains the clusters of  
720 mPFC, MTL, posterior cingulate cortex, and anterior temporal gyrus; frontoparietal control  
721 network contains the clusters of paracingulate gyrus, lateral PFC, and inferior parietal lobule;  
722 dorsal attention network contains the clusters of occipital pole, lateral occipital cortex, cuneal  
723 cortex, lingual gyrus, superior parietal lobule, and postcentral gyrus (Fig. S4b). To examine  
724 modulation effects on the connectivity of MTL/mPFC with the large-scale networks by  
725 different task demands, we computed mean connectivity between each of MTL and mPFC  
726 subregions with each network. For the default-mode network, we prepared for two masks, in  
727 which the MTL or mPFC was removed for the examinations of its connectivity with the  
728 default-mode network.

729

### 730 **Statistical analysis**

731 For searchlight-based RSA, we used an initial threshold of  $p < 0.001$ . If no clusters were  
732 revealed, a liberal threshold of  $p < 0.01$  was used. For whole brain FC analysis, an initial  
733 threshold of  $p < 0.001$  was used to identify robust network patterns. The reliability of clusters  
734 was tested using a non-parametric statistical inference that does not make assumptions about  
735 the distribution of the data (Nichols and Holmes, 2002; Winkler et al., 2014; Chadwick et al.,  
736 2015), the test was conducted with the FSL randomise package (version v2.9,

737 <http://fsl.fmrib.ox.ac.uk/fsl/fslwiki/Randomise>), and performed 5000 random sign-flips on  
738 whole brain searchlight beta images or FC images, we then reported clusters with the size  
739 higher than 95% of the maximal suprathreshold clusters in permutation distribution. ROI-  
740 based RSA used two-tailed one sample t-test to examine the significance of each anatomical  
741 mask. Paired t-test was used to examine the difference in connectivity among MTL and  
742 mPFC subregions between task demands. All t-test results were Bonferroni-corrected for  
743 multiple comparison. The statistical significance was determined according to whether the  
744 corrected *P* value was smaller than 0.05. Analysis of variance (ANOVA) was used to test the  
745 influence in connectivity between MTL/mPFC and large-scale functional network along time  
746 periods.

747 **Supplemental Information**

748 **“Medial prefrontal cortex represents the object-based cognitive map when**  
749 **remembering an egocentric target location”**

750 **Bo Zhang and Yuji Naya**

751

752 Supplemental Information includes six figures, two tables and two videos. The videos contain  
753 trial examples for Day 1 and Day 2. In the video of day 1, please note we only used examples  
754 of correct trials in which a green square of line was presented as feedback after the  
755 participant’s response. File size: 21.5 MB; Video duration: 1.23 minute; File format: .mp4;  
756 Video codec: H.264; Aspect ratio: 1024 x 768.

757 Figure S1: Behavioral results.

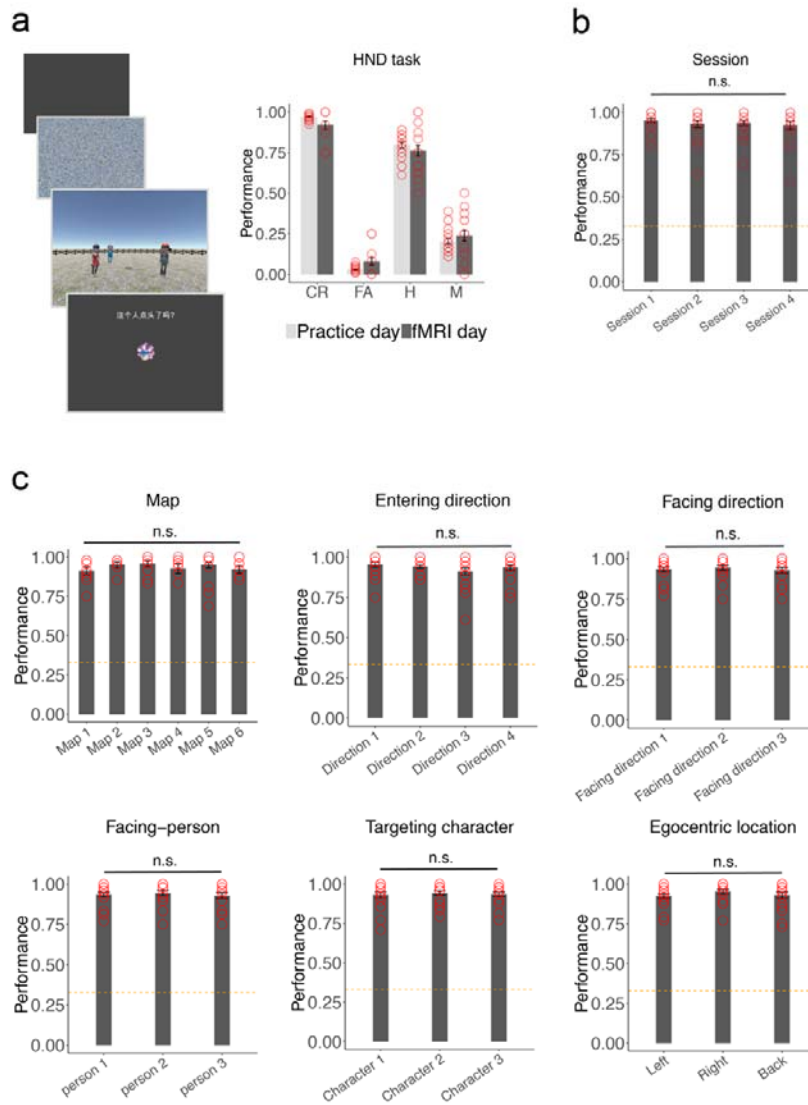

758  
 759 (a) Paradigm and performance for the head-nodding detection (HND) task. In both the  
 760 practice and fMRI day, participants exhibited a high accuracy of detecting head nodding and  
 761 rejecting if there was no head nodding (practice day: head-nodding trials,  $t(18) = 15.714$ ,  $P =$   
 762  $5.907 \times 10^{-12}$ , no head-nodding trials,  $t(18) = 112.4$ ,  $P = 2.2 \times 10^{-16}$ ; fMRI day: head-nodding  
 763 trials,  $t(15) = 7.399$ ,  $P = 2.224 \times 10^{-6}$ , no head-nodding trials,  $t(14) = 6.315$ ,  $P = 1.908 \times 10^{-5}$ ).  
 764 (b) Performance in the spatial-memory task. No significant difference was found among four  
 765 sessions ( $F(3,72) = 0.38$ ,  $P < 0.001$ ).

766 (c) Performance in the spatial-memory task for each category of spatial information. No  
767 significant difference was found among the spatial information in each category (map:  $F(5,33)$   
768  $= 2.19$ ,  $P = 0.08$ ; walking direction:  $F(3,72) = 1.10$ ,  $P = 0.35$ ; facing character:  $F(2,54) = 0.27$ ,  
769  $P = 0.76$ ; facing direction:  $F(2,54) = 0.94$ ,  $P = 0.40$ ; targeting character:  $F(2,54) = 0.15$ ,  $P =$   
770  $0.86$ ; egocentric direction:  $F(2,54) = 0.82$ ,  $P = 0.45$ ).

771 Figure S2: Neural representations of the cognitive map outside of MTL and mPFC, related to

772 Figure 2.

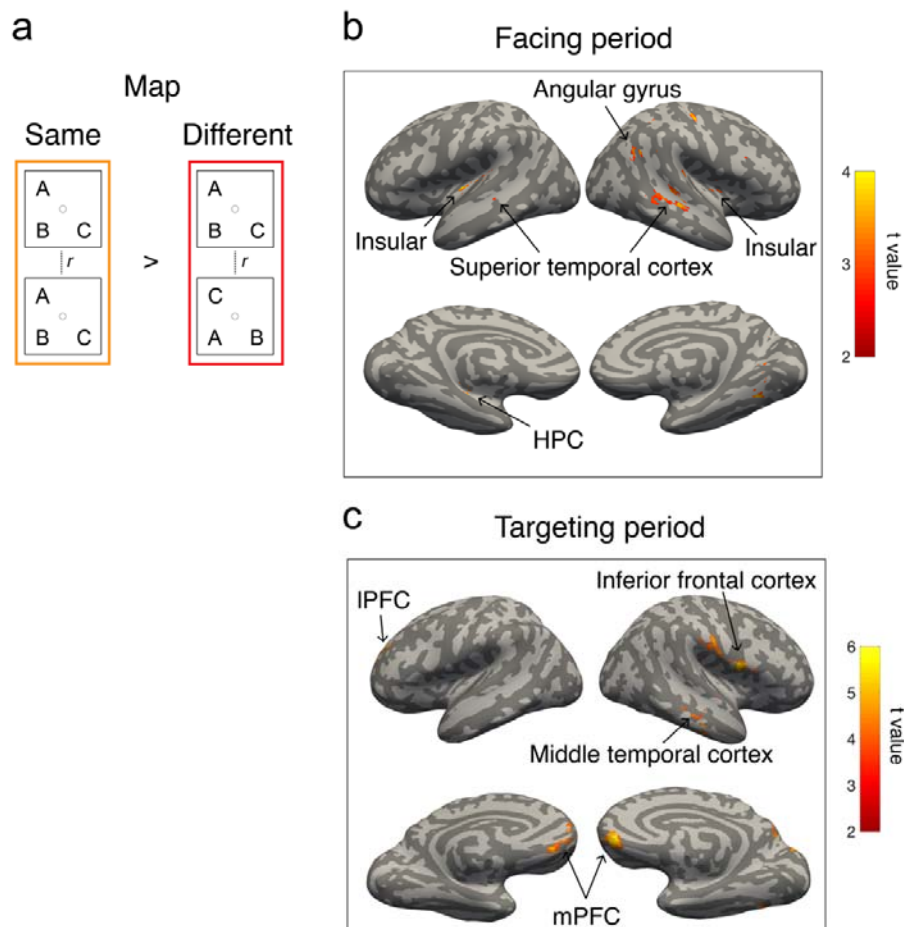

773

774 (a) Schematic representation of decoding the cognitive map using RSA. (b, c) Neural

775 representation of the cognitive map during facing period ( $P < 0.01$ , initial threshold;  $P < 0.05$ ,

776 cluster-corrected for multiple comparison) and targeting period ( $P < 0.001$ , initial threshold;  $P$

777  $< 0.05$ , cluster-corrected for multiple comparison), respectively.



778 Figure S3: Neural representation of the walking direction and character identity in the MTL,  
779 related to Figure 2.

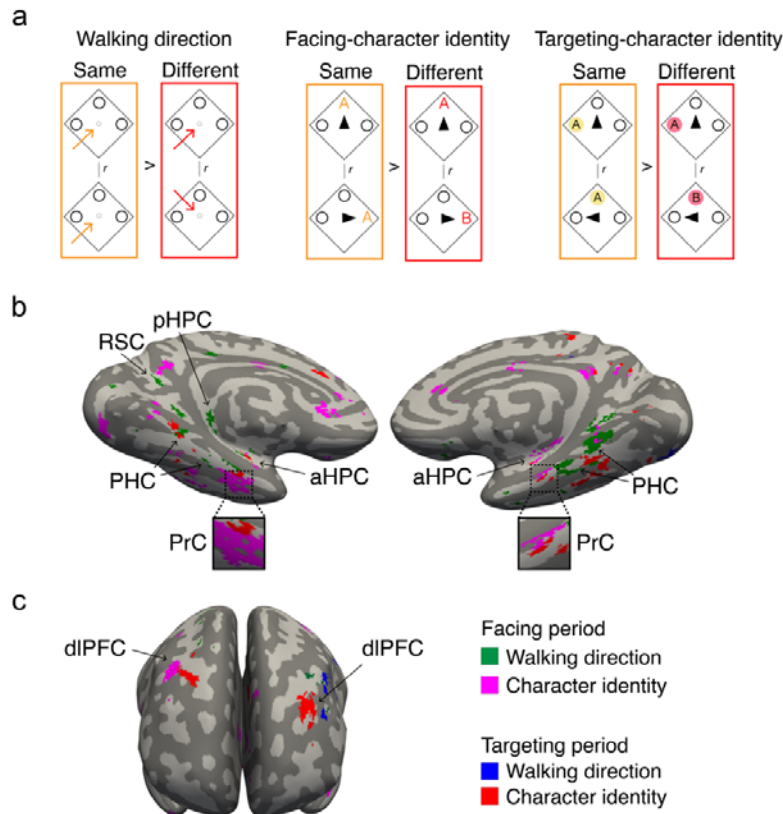

780  
781 (a) Schematic representation for decoding walking direction (left), the character identity in  
782 the facing period (middle) and targeting period (right), respectively. (b) The PrC selectively  
783 encodes the character identity not the walking direction, and the PHC, PPA, and HPC  
784 encodes both the character identity and walking direction. In particular, the PrC encoded both  
785 the facing- and targeting-character across both periods, while there was a clear attenuation in  
786 the encoding for the walking direction in the targeting period compared to the facing period  
787 ( $P < 0.001$ , initial threshold;  $P < 0.05$ , cluster-corrected for multiple comparison). (c) The  
788 clusters located in the IPFC for both the walking direction and character identity across the  
789 two temporal periods.

790 Figure S4: Example of anatomical and functional masks of a participant (No. 13), related  
791 to Figure 3, Figure 5 and Figure S5.

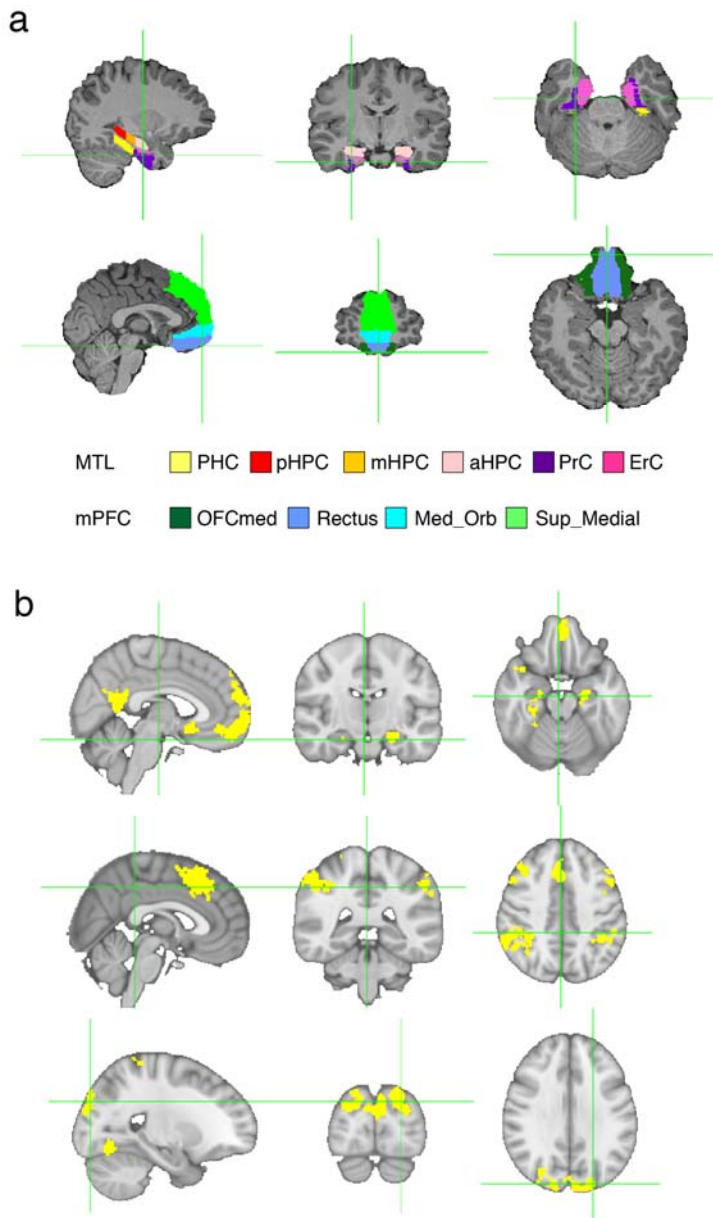

792

793

794 (a) medial temporal lobe sub-regions (top panel) and mPFC sub-regions (bottom panel) in

795 native space of participants, (b) The network masks identified from the contrast analysis in

796 connectivity between facing and targeting period and were overlapped on MNI152 template.

797 Default-mode network (top panel), Frontoparietal control network (middle panel), Dorsal

798 attention network (bottom panel).

799 Figure S5: Connectivity strength of the default-mode network, frontoparietal control,  
800 and dorsal attention network with each MTL and mPFC sub-region, related to Figure 5.

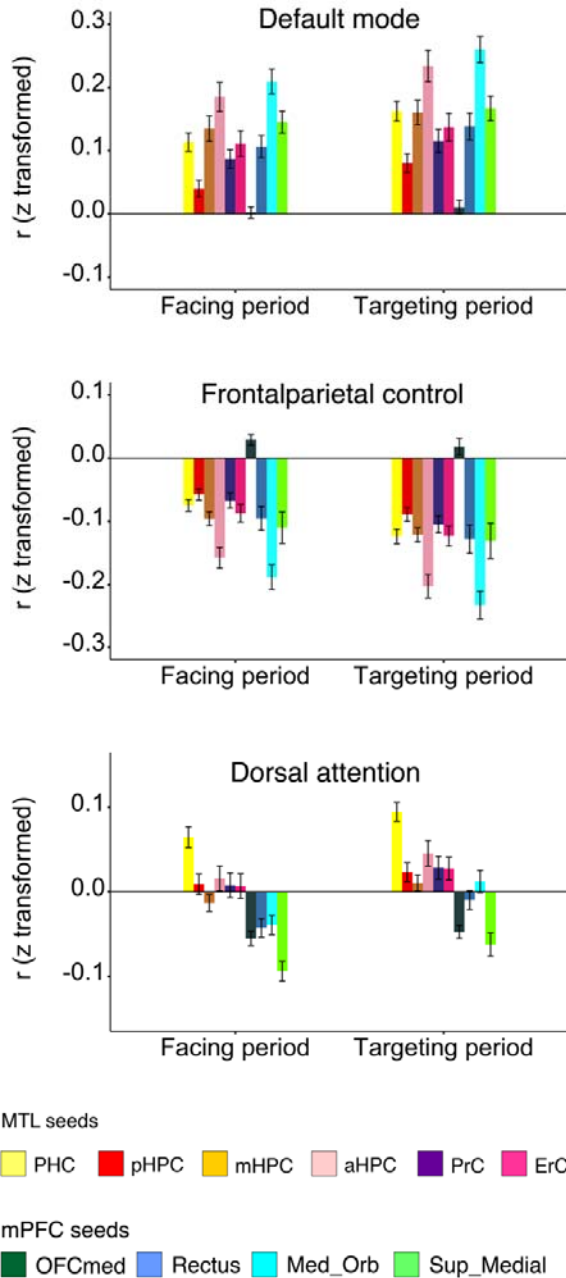

801  
802 Note that for the connectivity between default-mode network and MTL/mPFC, two network  
803 masks were prepared with the MTL and mPFC excluded, respectively.

804 Table S1: Averaged  $r^2$  among searchlight-based GLM regressors for the facing period (top)  
 805 and the targeting period (bottom) across participants, related to Figure 2, Figure 3, and Figure  
 806 4.

|                           | Map    | Walking direction | Facing character identity | Rotation angle | Self-orientation |
|---------------------------|--------|-------------------|---------------------------|----------------|------------------|
| Map                       | 1.0000 | 0.0057            | 0.0037                    | 0.0057         | 0.0037           |
| Walking direction         | 0.0057 | 1.0000            | 0.0057                    | 0.0008         | 0.0057           |
| Facing character identity | 0.0037 | 0.0057            | 1.0000                    | 0.0035         | 0.0307           |
| Rotation angle            | 0.0057 | 0.0008            | 0.0035                    | 1.0000         | 0.0035           |
| Self-orientation          | 0.0037 | 0.0057            | 0.0307                    | 0.0035         | 1.0000           |

807

|                                | Map    | Walking direction | Targeting character identity | Self-orientation | Allocentric position of target | Egocentric position of target | angle  |
|--------------------------------|--------|-------------------|------------------------------|------------------|--------------------------------|-------------------------------|--------|
| Map                            | 1.0000 | 0.0057            | 0.0037                       | 0.0037           | 0.0037                         | 0.0057                        | 0.0037 |
| Walking direction              | 0.0057 | 1.0000            | 0.0000                       | 0.0057           | 0.0000                         | 0.0008                        | 0.0000 |
| Targeting character identity   | 0.0037 | 0.0000            | 1.0000                       | 0.0000           | 0.0307                         | 0.0000                        | 0.0000 |
| Self-orientation               | 0.0037 | 0.0057            | 0.0000                       | 1.0000           | 0.0418                         | 0.0035                        | 0.0418 |
| Allocentric position of target | 0.0037 | 0.0000            | 0.0307                       | 0.0418           | 1.0000                         | 0.0000                        | 0.0418 |
| Egocentric position of target  | 0.0037 | 0.0000            | 0.0000                       | 0.0418           | 0.0418                         | 0.0000                        | 1.0000 |
| angle                          | 0.0057 | 0.0008            | 0.0000                       | 0.0035           | 0.0000                         | 1.0000                        | 0.0000 |

808

809 Table S2 Post-scanning interview questions (1<sup>st</sup> column), Typical feedback summarized from  
 810 participants (2<sup>nd</sup> column), Percentage of typical feedback for each question relative to all  
 811 participants (3<sup>rd</sup> column).

812

| Question                                                                                                                                                                                 | Typical feedback                                                                                                                                           | Percentage |
|------------------------------------------------------------------------------------------------------------------------------------------------------------------------------------------|------------------------------------------------------------------------------------------------------------------------------------------------------------|------------|
| What did you direct your attention to during walking?                                                                                                                                    | I focused on the heads of 3 characters to detect the head-nodding.                                                                                         | 100%       |
| Did you try to memorize the relative position of 3 characters? If yes, how did you memorize? If no, how did you solve the task?                                                          | No, I solved the task because I remembered the scene that I had looked at during the walking period.                                                       | 79%        |
|                                                                                                                                                                                          | Yes, I tried to memorize each scene like photograph during the walking period.                                                                             | 21%        |
| Do you think whether you walked toward 3 characters in the same direction across all trials or in different directions?                                                                  | I moved in same direction for all the time.                                                                                                                | 89%        |
|                                                                                                                                                                                          | It might be different directions although I am not sure.                                                                                                   | 11%        |
| Did you notice how many different spatial arrangements of 3 characters were presented during the task? If yes, answer the number of spatial arrangements.                                | No, I did not notice the number of arrangements.                                                                                                           | 100%       |
| Did you feel as your body rotated or as a spatial environment rotated around you when you looked at the facing character? Do you think whether or not the angles differed across trials? | It was my body rotating, I felt the difference in rotation angle across trials.                                                                            | 84%        |
|                                                                                                                                                                                          | It was my body rotating, I did not notice the difference in the rotation angle.                                                                            | 16%        |
| What did you think about when you looked at the facing-character?                                                                                                                        | I recalled the relative position of the three characters during walking, and my position and orientation after walking.                                    | 100%       |
|                                                                                                                                                                                          | I imagined the three human characters' directions relative to me.                                                                                          | 79%        |
| What did you think about when you looked at the targeting character?                                                                                                                     | I first recalled the position of three human characters relative to me. I confirmed my facing direction around them, and then I chose the target location. | 100%       |
|                                                                                                                                                                                          | I recalled what I experienced during walking period.                                                                                                       | 21%        |

813

814 **Reference**

815

816 Abrahams, S., Pickering, A., Polkey, C. E., & Morris, R. G. (1997). Spatial memory deficits  
817 in patients with unilateral damage to the right hippocampal  
818 formation. *Neuropsychologia*, 35(1), 11-24.

819

820 Andrews, S. C., Hoy, K. E., Enticott, P. G., Daskalakis, Z. J., & Fitzgerald, P. B. (2011).  
821 Improving working memory: the effect of combining cognitive activity and anodal  
822 transcranial direct current stimulation to the left dorsolateral prefrontal cortex. *Brain*  
823 stimulation, 4(2), 84-89.

824

825 Addis, D. R., Wong, A. T., & Schacter, D. L. (2007). Remembering the past and imagining  
826 the future: common and distinct neural substrates during event construction and  
827 elaboration. *Neuropsychologia*, 45(7), 1363-1377.

828

829 Barbey, A. K., Koenigs, M., & Grafman, J. (2013). Dorsolateral prefrontal contributions to  
830 human working memory. *cortex*, 49(5), 1195-1205.

831

832 Brunoni, A. R., & Vanderhasselt, M. A. (2014). Working memory improvement with non-  
833 invasive brain stimulation of the dorsolateral prefrontal cortex: a systematic review and meta-  
834 analysis. *Brain and cognition*, 86, 1-9.

835

836 Bird, C. M., Capponi, C., King, J. A., Doeller, C. F., & Burgess, N. (2010). Establishing the  
837 boundaries: the hippocampal contribution to imagining scenes. *Journal of*  
838 *Neuroscience*, 30(35), 11688-11695.

839

840 Buffalo, E.A. (2015). Bridging the gap between spatial and mnemonic views of the  
841 hippocampal formation. *Hippocampus* 25, 713-718.

842

843 Balaguer, J., Spiers, H., Hassabis, D., & Summerfield, C. (2016). Neural mechanisms of  
844 hierarchical planning in a virtual subway network. *Neuron*, 90(4), 893-903.

845

846 Bradfield, L. A., Dezfouli, A., van Holstein, M., Chieng, B., & Balleine, B. W. (2015).  
847 Medial orbitofrontal cortex mediates outcome retrieval in partially observable task  
848 situations. *Neuron*, 88(6), 1268-1280.

849

850 Brown, T. I., Carr, V. A., LaRocque, K. F., Favila, S. E., Gordon, A. M., Bowles, B., ... &  
851 Wagner, A. D. (2016). Prospective representation of navigational goals in the human  
852 hippocampus. *Science*, 352(6291), 1323-1326.

853

854 Cavanna, A.E., and Trimble, M.R. (2006). The precuneus: a review of its functional anatomy  
855 and behavioural correlates. *Brain : a journal of neurology* 129, 564-583.

856

857 Campbell, K.L., Madore, K.P., Benoit, R.G., Thakral, P.P., and Schacter, D.L. (2018).  
858 Increased hippocampus to ventromedial prefrontal connectivity during the construction of  
859 episodic future events. *Hippocampus* 28, 76-80.

860

861 Chadwick, M. J., Jolly, A. E., Amos, D. P., Hassabis, D., & Spiers, H. J. (2015). A goal  
862 direction signal in the human entorhinal/subicular region. *Current Biology*, 25(1), 87-92.

863

864 Chadwick, M. J., Bonnici, H. M., & Maguire, E. A. (2012). Decoding information in the  
865 human hippocampus: a user's guide. *Neuropsychologia*, 50(13), 3107-3121.

866

867 Duvernoy, H. M. (2005). *The human hippocampus: functional anatomy, vascularization and*  
868 *serial sections with MRI*. Springer Science & Business Media.

869

870 Damasio, H., Grabowski, T., Frank, R., Galaburda, A.M., and Damasio, A.R. (1994). The  
871 return of Phineas Gage: clues about the brain from the skull of a famous patient. *Science* 264,  
872 1102-1105.

873

874 Doeller, C. F., King, J. A., & Burgess, N. (2008). Parallel striatal and hippocampal systems  
875 for landmarks and boundaries in spatial memory. *Proceedings of the National Academy of*  
876 *Sciences*, 105(15), 5915-5920.

877

878 Ekstrom, A.D., Kahana, M.J., Caplan, J.B., Fields, T.A., Isham, E.A., Newman, E.L., and Fried, I.  
879 (2003). Cellular networks underlying human spatial navigation. *Nature* 425, 184-188.

880

881 Eichenbaum, H. (2017). The role of the hippocampus in navigation is memory. *Journal of*  
882 *neurophysiology* 117, 1785-1796.

883

884 Epstein, R.A., Patai, E.Z., Julian, J.B., and Spiers, H.J. (2017). The cognitive map in humans:  
885 spatial navigation and beyond. *Nature neuroscience* 20, 1504-1513.

886

887 Evans, T., Bicanski, A., Bush, D., & Burgess, N. (2016). How environment and self-motion  
888 combine in neural representations of space. *The Journal of physiology*, 594(22), 6535-6546.

889

890 Feierstein, C. E., Quirk, M. C., Uchida, N., Sosulski, D. L., & Mainen, Z. F. (2006).  
891 Representation of spatial goals in rat orbitofrontal cortex. *Neuron*, 51(4), 495-507.

892

893 Funahashi, S. (2017). Prefrontal Contribution to Decision-Making under Free-Choice  
894 Conditions. *Frontiers in neuroscience* 11, 431.

895

896 Gaesser, B., Spreng, R. N., McLelland, V. C., Addis, D. R., & Schacter, D. L. (2013).  
897 Imagining the future: evidence for a hippocampal contribution to constructive  
898 processing. *Hippocampus*, 23(12), 1150-1161.

899

900 Gallagher, M., McMahan, R. W., & Schoenbaum, G. (1999). Orbitofrontal cortex and  
901 representation of incentive value in associative learning. *Journal of Neuroscience*, 19(15),  
902 6610-6614.

903

904 Gelström, K. M., & Graziano, M. S. (2017). The inferior parietal lobule and temporoparietal  
905 junction: a network perspective. *Neuropsychologia*, 105, 70-83.

906

907 Himmelbach, M., Erb, M., and Karnath, H.O. (2006). Exploring the visual world: the neural  
908 substrate of spatial orienting. *NeuroImage* 32, 1747-1759.

909

910 Hargreaves, E.L., Rao, G., Lee, I., and Knierim, J.J. (2005). Major dissociation between  
911 medial and lateral entorhinal input to dorsal hippocampus. *Science* 308, 1792-1794.

912



- 913 Hassabis, D., & Maguire, E. A. (2007). Deconstructing episodic memory with  
914 construction. *Trends in cognitive sciences*, 11(7), 299-306.  
915
- 916 Insausti, R., Juottonen, K., Soininen, H., Insausti, A. M., Partanen, K., Vainio, P., ... &  
917 Pitkänen, A. (1998). MR volumetric analysis of the human entorhinal, perirhinal, and  
918 temporopolar cortices. *American Journal of Neuroradiology*, 19(4), 659-671.  
919
- 920 Javadi, A.H., Emo, B., Howard, L.R., Zisch, F.E., Yu, Y., Knight, R., Pinelo Silva, J., and  
921 Spiers, H.J. (2017). Hippocampal and prefrontal processing of network topology to simulate  
922 the future. *Nature communications* 8, 14652.  
923
- 924 Jenkinson, M., & Smith, S. (2001). A global optimisation method for robust affine  
925 registration of brain images. *Medical image analysis*, 5(2), 143-156.  
926
- 927 Jimura, K., Konishi, S., and Miyashita, Y. (2004). Dissociable concurrent activity of lateral  
928 and medial frontal lobe during negative feedback processing. *NeuroImage* 22, 1578-1586.  
929
- 930 Karnath, H. O. (2001). New insights into the functions of the superior temporal  
931 cortex. *Nature Reviews Neuroscience*, 2(8), 568.  
932
- 933 Kumaran, D., Summerfield, J. J., Hassabis, D., & Maguire, E. A. (2009). Tracking the  
934 emergence of conceptual knowledge during human decision making. *Neuron*, 63(6), 889-901.  
935
- 936 Kriegeskorte, N., Goebel, R., & Bandettini, P. (2006). Information-based functional brain  
937 mapping. *Proceedings of the National Academy of Sciences*, 103(10), 3863-3868.  
938
- 939 Kriegeskorte, N., Mur, M., Ruff, D. A., Kiani, R., Bodurka, J., Esteky, H., ... & Bandettini, P.  
940 A. (2008). Matching categorical object representations in inferior temporal cortex of man and  
941 monkey. *Neuron*, 60(6), 1126-1141.  
942
- 943 Kable, J.W., and Glimcher, P.W. (2009). The neurobiology of decision: consensus and  
944 controversy. *Neuron* 63, 733-745.  
945
- 946 Konishi, S., Wheeler, M.E., Donaldson, D.I., and Buckner, R.L. (2000). Neural correlates of  
947 episodic retrieval success. *NeuroImage* 12, 276-286.  
948
- 949 Libby, L. A., Hannula, D. E., & Ranganath, C. (2014). Medial temporal lobe coding of item  
950 and spatial information during relational binding in working memory. *Journal of*  
951 *Neuroscience*, 34(43), 14233-14242.  
952
- 953 Meister, M.L.R., and Buffalo, E.A. (2018). Neurons in primate entorhinal cortex represent  
954 gaze position in multiple spatial reference frames. *The Journal of neuroscience : the official*  
955 *journal of the Society for Neuroscience*.  
956
- 957 Miller, E. K., Lundqvist, M., & Bastos, A. M. (2018). Working Memory 2.0. *Neuron*, 100(2),  
958 463-475.  
959
- 960 Moser, E.I., Moser, M.B., and McNaughton, B.L. (2017). Spatial representation in the  
961 hippocampal formation: a history. *Nature neuroscience* 20, 1448-1464.



962  
963 Maguire, E. A., Frackowiak, R. S., & Frith, C. D. (1997). Recalling routes around London:  
964 activation of the right hippocampus in taxi drivers. *Journal of neuroscience*, 17(18), 7103-  
965 7110.  
966  
967 McCormick, C., Ciaramelli, E., De Luca, F., and Maguire, E.A. (2018). Comparing and  
968 Contrasting the Cognitive Effects of Hippocampal and Ventromedial Prefrontal Cortex  
969 Damage: A Review of Human Lesion Studies. *Neuroscience* 374, 295-318.  
970  
971 Nakazawa, K., Quirk, M.C., Chitwood, R.A., Watanabe, M., Yeckel, M.F., Sun, L.D., Kato,  
972 A., Carr, C.A., Johnston, D., Wilson, M.A., et al. (2002). Requirement for hippocampal CA3  
973 NMDA receptors in associative memory recall. *Science* 297, 211-218.  
974  
975 Nichols, T. E., & Holmes, A. P. (2002). Nonparametric permutation tests for functional  
976 neuroimaging: a primer with examples. *Human brain mapping*, 15(1), 1-25.  
977  
978 Naya, Y., and Suzuki, W.A. (2011). Integrating what and when across the primate medial  
979 temporal lobe. *Science* 333, 773-776.  
980  
981 Naya, Y., Yoshida, M., and Miyashita, Y. (2001). Backward spreading of memory-retrieval  
982 signal in the primate temporal cortex. *Science* 291, 661-664.  
983  
984 O'Keefe, J., & Dostrovsky, J. (1971). The hippocampus as a spatial map: preliminary  
985 evidence from unit activity in the freely-moving rat. *Brain research*.  
986  
987 Pruessner, J. C., Li, L. M., Serles, W., Pruessner, M., Collins, D. L., Kabani, N., ... & Evans,  
988 A. C. (2000). Volumetry of hippocampus and amygdala with high-resolution MRI and three-  
989 dimensional analysis software: minimizing the discrepancies between laboratories. *Cerebral*  
990 *cortex*, 10(4), 433-442.  
991  
992 Pruessner, J. C., Köhler, S., Crane, J., Pruessner, M., Lord, C., Byrne, A., ... & Evans, A. C.  
993 (2002). Volumetry of temporopolar, perirhinal, entorhinal and parahippocampal cortex from  
994 high-resolution MR images: considering the variability of the collateral sulcus. *Cerebral*  
995 *Cortex*, 12(12), 1342-1353.  
996  
997 Packard, M.G., and McGaugh, J.L. (1996). Inactivation of hippocampus or caudate nucleus  
998 with lidocaine differentially affects expression of place and response learning. *Neurobiology*  
999 *of learning and memory* 65, 65-72.  
1000  
1001 Poppenk, J., Evensmoen, H. R., Moscovitch, M., & Nadel, L. (2013). Long-axis  
1002 specialization of the human hippocampus. *Trends in cognitive sciences*, 17(5), 230-240.  
1003  
1004 Price, A. R., Peelle, J. E., Bonner, M. F., Grossman, M., & Hamilton, R. H. (2016). Causal  
1005 evidence for a mechanism of semantic integration in the angular gyrus as revealed by high-  
1006 definition transcranial direct current stimulation. *Journal of Neuroscience*, 36(13), 3829-3838.  
1007  
1008 Ranganath, C., Heller, A., Cohen, M. X., Brozinsky, C. J., & Rissman, J. (2005). Functional  
1009 connectivity with the hippocampus during successful memory  
1010 formation. *Hippocampus*, 15(8), 997-1005.  
1011

- 1012 Ranganath, C., & Ritchey, M. (2012). Two cortical systems for memory-guided  
1013 behaviour. *Nature Reviews Neuroscience*, 13(10), 713.  
1014
- 1015 Rolls, E. T., Joliot, M., & Tzourio-Mazoyer, N. (2015). Implementation of a new parcellation  
1016 of the orbitofrontal cortex in the automated anatomical labeling atlas. *Neuroimage*, 122, 1-5.  
1017
- 1018 Redish, A.D., and Touretzky, D.S. (1998). The role of the hippocampus in solving the Morris  
1019 water maze. *Neural computation* 10, 73-111.  
1020
- 1021 Seghier, M. L. (2013). The angular gyrus: multiple functions and multiple subdivisions. *The*  
1022 *Neuroscientist*, 19(1), 43-61.  
1023
- 1024 Suarez-Jimenez, B., Bisby, J. A., Horner, A. J., King, J. A., Pine, D. S., & Burgess, N. (2018).  
1025 Linked networks for learning and expressing location-specific threat. *Proceedings of the*  
1026 *National Academy of Sciences*, 115(5), E1032-E1040.  
1027
- 1028 Spiers, H. J., & Maguire, E. A. (2007). A navigational guidance system in the human  
1029 brain. *Hippocampus*, 17(8), 618-626.  
1030
- 1031 Schinazi, V. R., Nardi, D., Newcombe, N. S., Shipley, T. F., & Epstein, R. A. (2013).  
1032 Hippocampal size predicts rapid learning of a cognitive map in humans. *Hippocampus*, 23(6),  
1033 515-528.  
1034
- 1035 Squire, L.R., and Zola-Morgan, J.T. (1991). The cognitive neuroscience of human memory since  
1036 H.M. *Annual review of neuroscience* 34, 259-288.  
1037
- 1038 Schacter, D.L., Addis, D.R., and Buckner, R.L. (2007). Remembering the past to imagine the  
1039 future: the prospective brain. *Nature reviews Neuroscience* 8, 657-661.  
1040
- 1041 Spreng, R. N., & Schacter, D. L. (2011). Default network modulation and large-scale network  
1042 interactivity in healthy young and old adults. *Cerebral Cortex*, 22(11), 2610-2621.  
1043
- 1044 Schacter, D.L. (2012). Adaptive constructive processes and the future of memory. *The*  
1045 *American psychologist* 67, 603-613.  
1046
- 1047 Schacter, D. L., Addis, D. R., Hassabis, D., Martin, V. C., Spreng, R. N., & Szpunar, K. K.  
1048 (2012). The future of memory: remembering, imagining, and the brain. *Neuron*, 76(4), 677-  
1049 694.  
1050
- 1051 Stolk, A., D'Imperio, D., di Pellegrino, G., and Toni, I. (2015). Altered communicative  
1052 decisions following ventromedial prefrontal lesions. *Current biology : CB* 25, 1469-1474.  
1053
- 1054 Saxena, S., Brody, A. L., Schwartz, J. M., & Baxter, L. R. (1998). Neuroimaging and frontal-  
1055 subcortical circuitry in obsessive-compulsive disorder. *The British Journal of*  
1056 *Psychiatry*, 173(S35), 26-37.  
1057
- 1058 Suzuki, W., and Naya, Y. (2011). Two routes for remembering the past. *Cell* 147, 493-495.  
1059
- 1060 Suzuki, W.A., and Naya, Y. (2014). The perirhinal cortex. *Annual review of neuroscience* 37,  
1061 39-53.

- 1062  
1063 Tolman, E. C. (1948). Cognitive maps in rats and men. *Psychological review*, 55(4), 189.  
1064  
1065 Tavares, R. M., Mendelsohn, A., Grossman, Y., Williams, C. H., Shapiro, M., Trope, Y., &  
1066 Schiller, D. (2015). A map for social navigation in the human brain. *Neuron*, 87(1), 231-243.  
1067  
1068 Tulving, E. (2002). Episodic memory: from mind to brain. *Annual review of*  
1069 *psychology*, 53(1), 1-25.  
1070  
1071 Tomparry, A., & Davachi, L. (2017). Consolidation promotes the emergence of  
1072 representational overlap in the hippocampus and medial prefrontal cortex. *Neuron*, 96(1),  
1073 228-241.  
1074  
1075 Vincent, J. L., Kahn, I., Snyder, A. Z., Raichle, M. E., & Buckner, R. L. (2008). Evidence for  
1076 a frontoparietal control system revealed by intrinsic functional connectivity. *Journal of*  
1077 *neurophysiology*, 100(6), 3328-3342.  
1078  
1079 Vass LK, Epstein RA (2013) Abstract representations of location and facing direction in the  
1080 human brain. *J Neurosci* 33:6133–6142. CrossRef Medline  
1081  
1082 Woollett, K., & Maguire, E. A. (2011). Acquiring “the Knowledge” of London's layout  
1083 drives structural brain changes. *Current biology*, 21(24), 2109-2114.  
1084  
1085 Winkler, A. M., Ridgway, G. R., Webster, M. A., Smith, S. M., & Nichols, T. E. (2014).  
1086 Permutation inference for the general linear model. *Neuroimage*, 92, 381-397.  
1087  
1088 Wang, C., Chen, X., Lee, H., Deshmukh, S.S., Yoganarasimha, D., Savelli, F., and Knierim,  
1089 J.J. (2018). Egocentric coding of external items in the lateral entorhinal cortex. *Science* 362,  
1090 945-949.  
1091  
1092 Woolrich, M. W., Ripley, B. D., Brady, M., & Smith, S. M. (2001). Temporal  
1093 Autocorrelation in Univariate Linear Modeling of FMRI Data. *NeuroImage*, 14(6), 1370–  
1094 1386.  
1095  
1096 Woolrich, M. W., Behrens, T. E. J., & Smith, S. M. (2004). Constrained linear basis sets for  
1097 HRF modelling using Variational Bayes. *NeuroImage*, 21(4), 1748–1761.  
1098  
1099 Wikenheiser, A. M., & Schoenbaum, G. (2016). Over the river, through the woods: cognitive  
1100 maps in the hippocampus and orbitofrontal cortex. *Nature Reviews Neuroscience*, 17(8), 513.  
1101  
1102 Young, J. J., & Shapiro, M. L. (2011). Dynamic coding of goal-directed paths by orbital  
1103 prefrontal cortex. *Journal of Neuroscience*, 31(16), 5989-6000.  
1104  
1105 Yamada, H., Louie, K., Tymula, A., and Glimcher, P.W. (2018). Free choice shapes  
1106 normalized value signals in medial orbitofrontal cortex. *Nature communications* 9, 162.  
1107  
1108 Zeithamova, D., de Araujo Sanchez, M. A., & Adke, A. (2017). Trial timing and pattern-  
1109 information analyses of fMRI data. *Neuroimage*, 153, 221-231.
